# Supplementary material for: lncRNAs UC.145 and PRKG1-AS1 Determine the Functional Output of DKK1 in Regulating the Wnt Signaling Pathway in Gastric Cancer
Source: MDPI journal article supplement (doi:10.3390/cancers14102369), 2022-05-11
Supplement: s1 [file s1]

# Supplementary Information

## Supplementary Figures and Legends

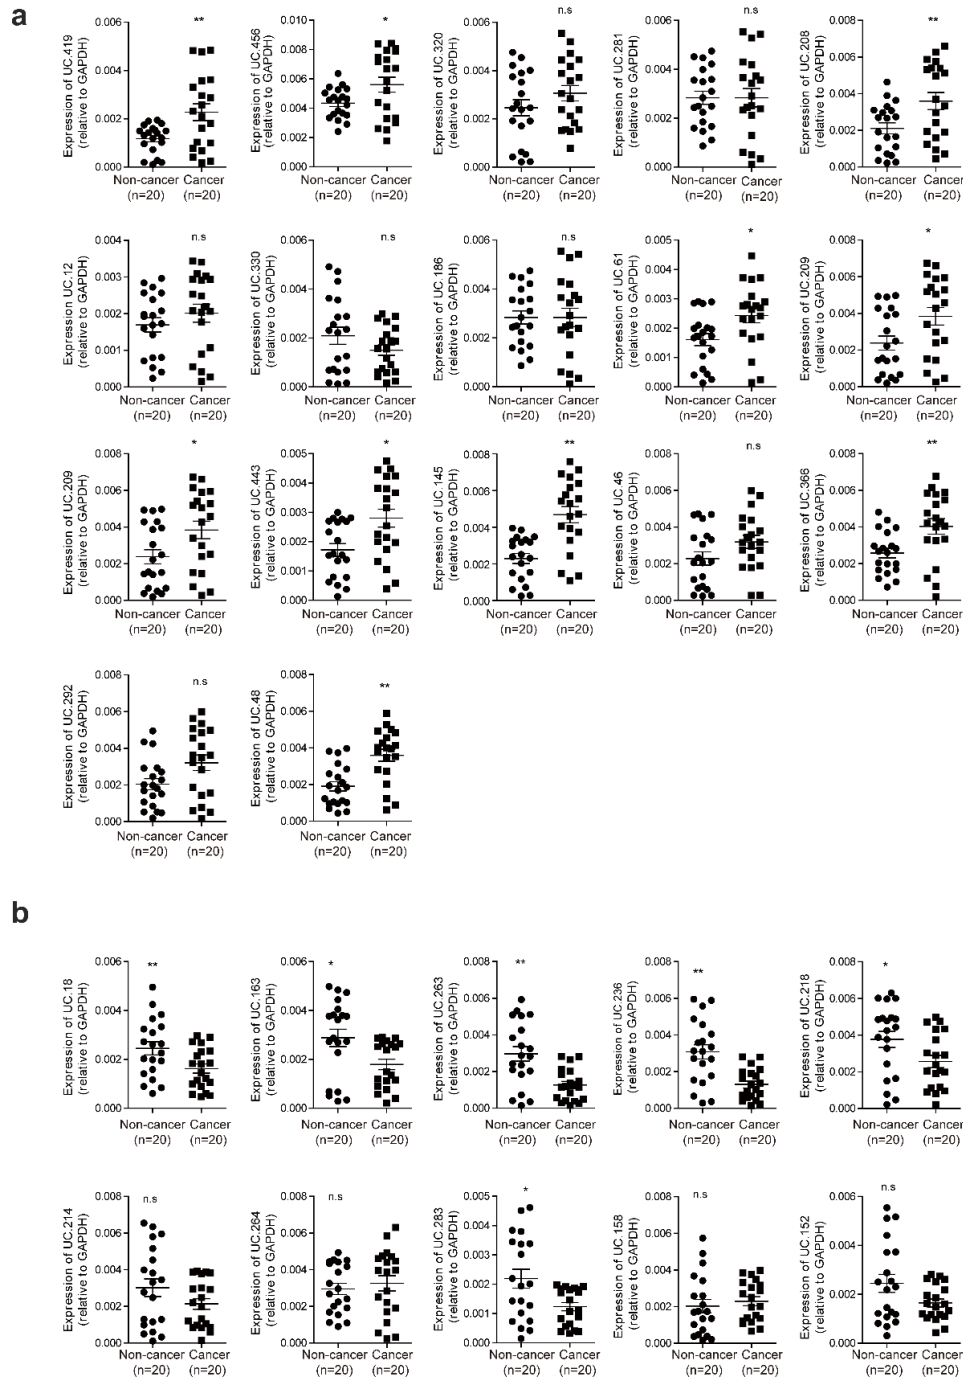

**Figure S1.** T-UCR validation. **(a)** Using microarray analysis results, 17 T-UCRs with increased mRNA expression were identified in 20 samples obtained from patients with gastric cancer (GC), measured using qRT-PCR. **(b)** Relative mRNA expression of ten T-UCRs with reduced expression in GC tissue measured using qRT-PCR. FC > 2.0,  $p < 0.05$ . Data are shown as mean  $\pm$  SD of three independent experiments (\*  $p \leq 0.05$ ; \*\*  $p \leq 0.01$ ).

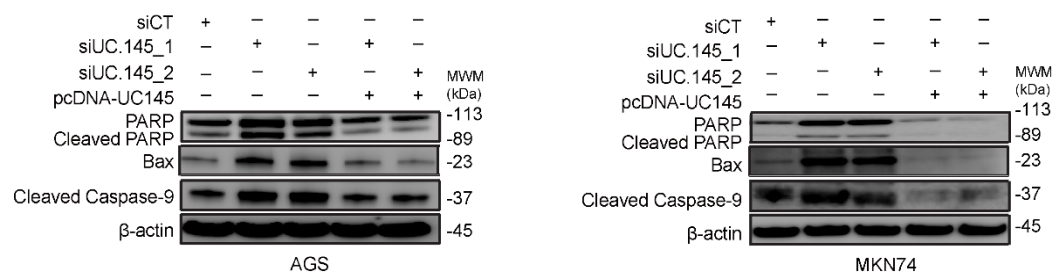

**Figure S2.** Effect of UC.145 on apoptosis. Western blot analysis of apoptosis marker protein levels in AGS (**left** panel) and MKN74 (**right** panel) cells transfected with siControl (siCT), siUC.145s, or pcDNA-UC.145.

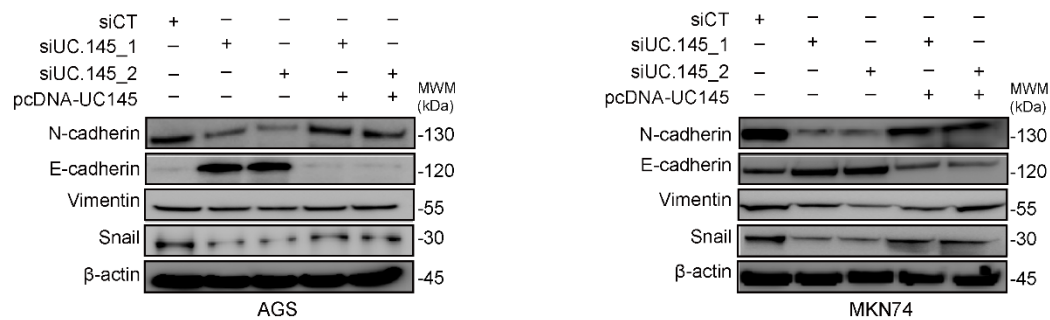

**Figure S3.** Effect of UC.145 on the EMT process of gastric cancer cells. Western blot analysis of EMT marker protein levels in AGS (**left** panel) and MKN74 (**right** panel) cells transfected with siControl (siCT), siUC.145s, or pcDNA-UC.145.

**a**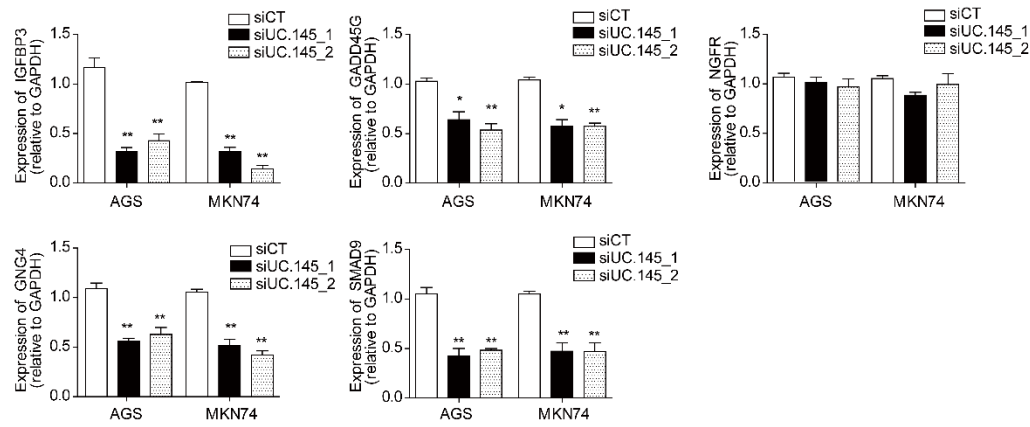**b**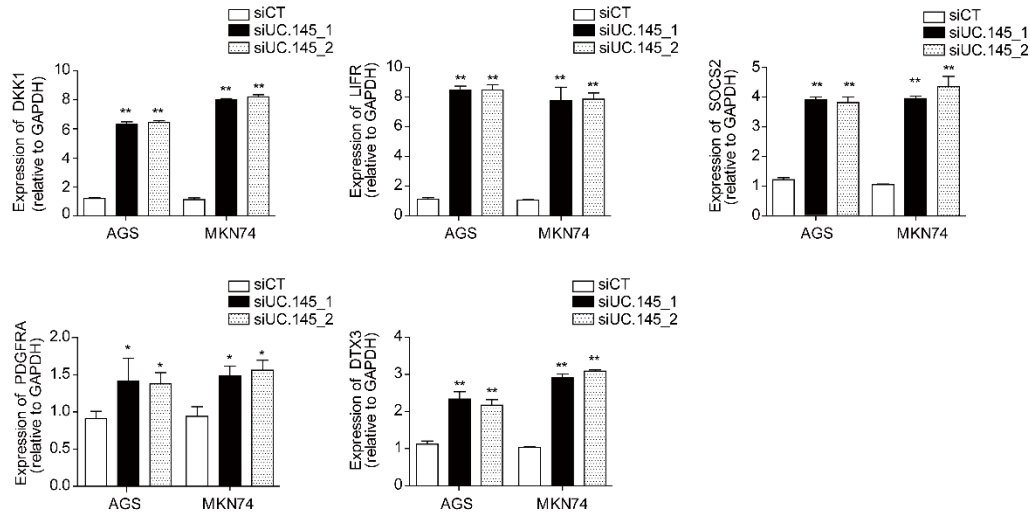

**Figure S4.** Differentially expressed genes in gastric cancer cells. Relative mRNA expression of (a) five downregulated genes and (b) five upregulated genes in AGS and MKN74 cells determined by Nanostring pathway analysis of putative target genes of UC.145, measured using qRT-PCR. Data are shown as mean  $\pm$  SD of three independent experiments (\*  $p \leq 0.05$ ; \*\*  $p \leq 0.01$ ).

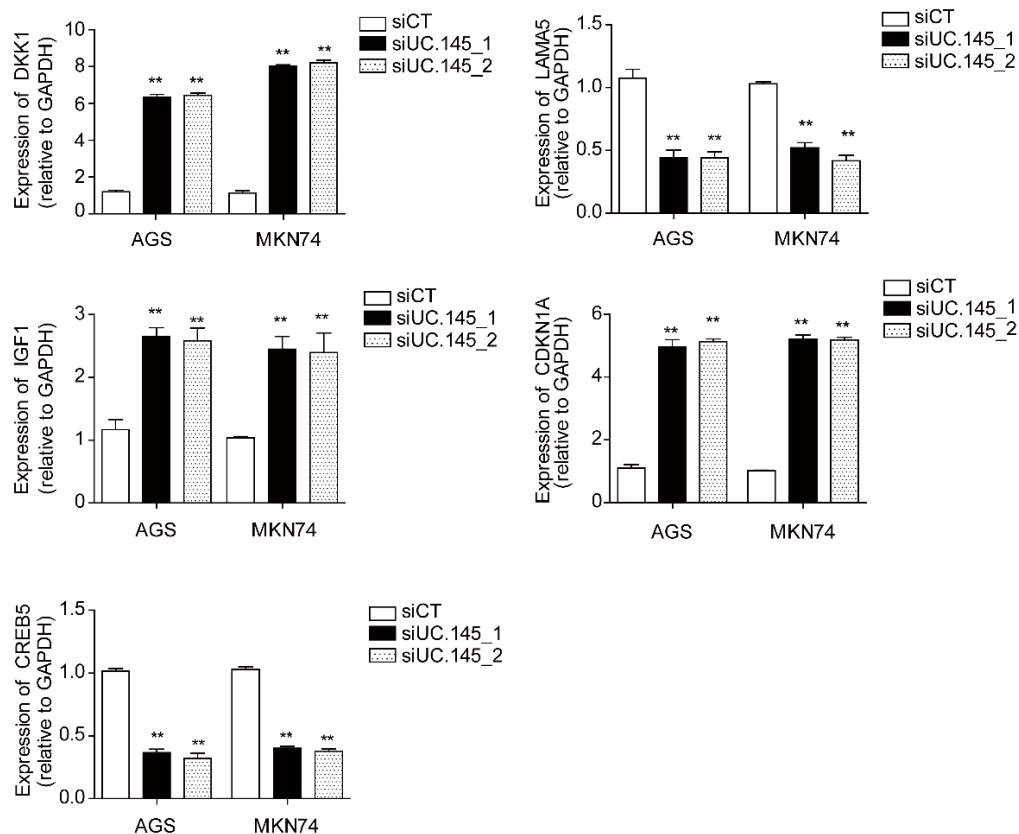

**Figure S5.** UC.145 target gene identification. Relative mRNA expression of five target genes of UC.145 in AGS and MKN74 cells based on Venn diagram-based analysis of a GEO dataset, measured using qRT-PCR. Data are shown as mean  $\pm$  SD of three independent experiments (\*  $p \leq 0.05$ ; \*\*  $p \leq 0.01$ ).

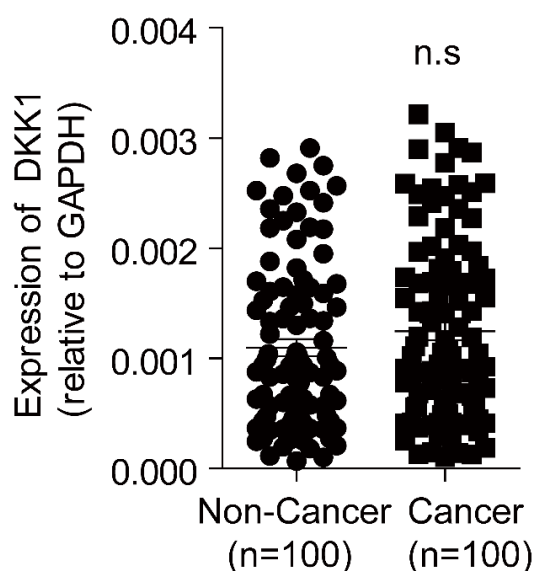

**Figure S6.** Confirmation of *DKK1* expression in gastric cancer (GC). Relative mRNA expression of *DKK1* in 100 pairs of tissue samples obtained from patients with GC, measured using qRT-PCR. n.s., not significant.

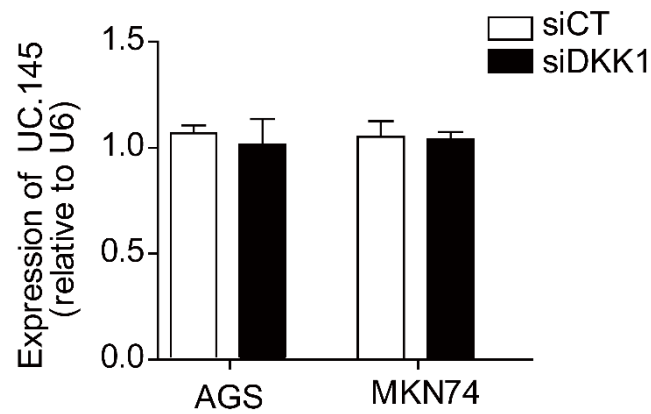

**Figure S7.** *DKK1* silencing affects UC.145 expression in gastric cancer cells. Relative mRNA expression of UC.145 in AGS and MKN74 cells transfected with siDKK1, measured using qRT-PCR.

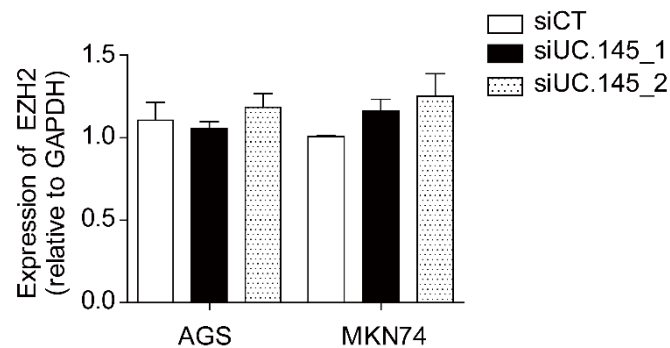

**Figure S8.** UC.145 affects EZH2 at the transcriptional level in GC cells. Relative mRNA expression of EZH2 in AGS and MKN74 cells, measured using qRT-PCR.

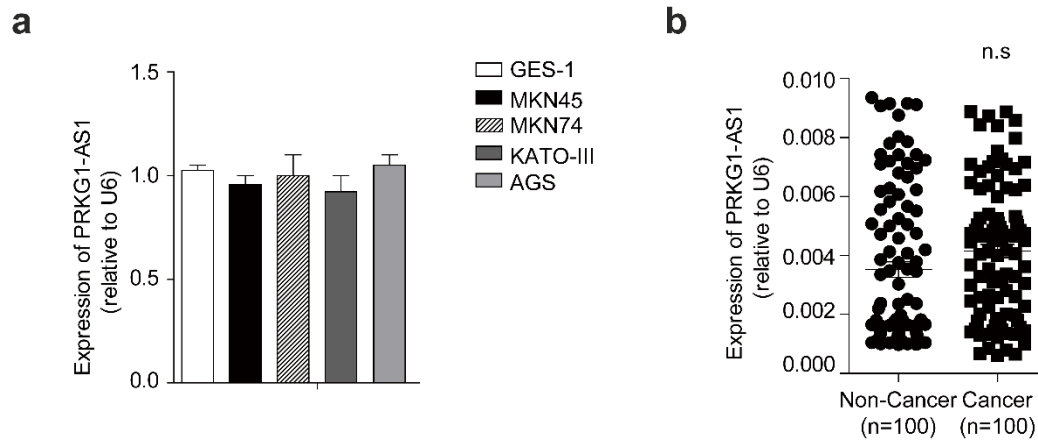

**Figure S9.** Confirmation of PRKG1-AS1 expression in gastric cancer (GC). **(a)** Relative mRNA expression of PRKG1-AS1 in the normal gastric cells (GES-1) compared with that in GC cells, measured using qRT-PCR; **(b)** Relative mRNA expression of PRKG-AS1 in 100 pairs of tissue samples obtained from patients with gastric cancer, measured using qRT-PCR. n.s., not significant.

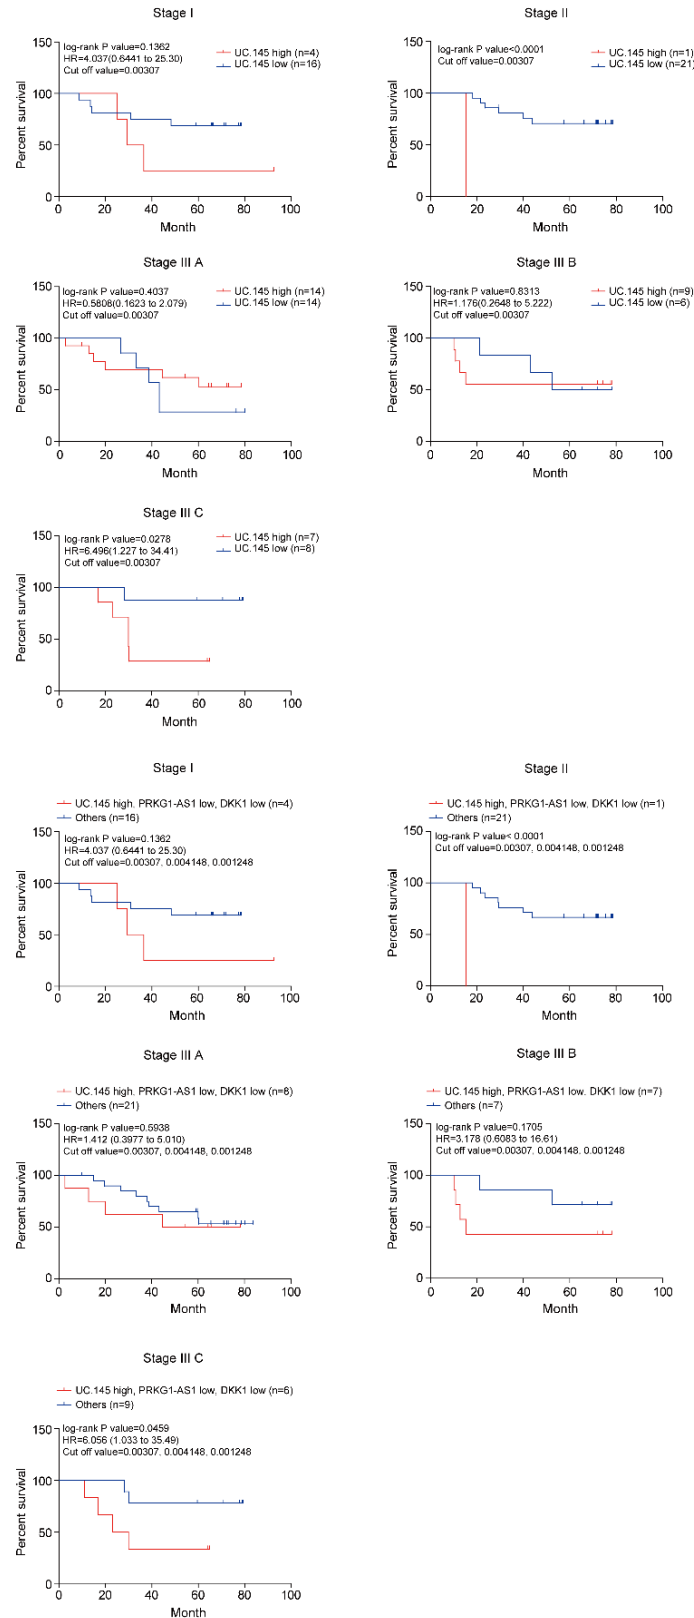

**Figure S10.** Survival stage analysis. Kaplan–Meier estimates of patient overall survival in each cancer stage using the number of cases in which each gene was either upregulated or downregulated.

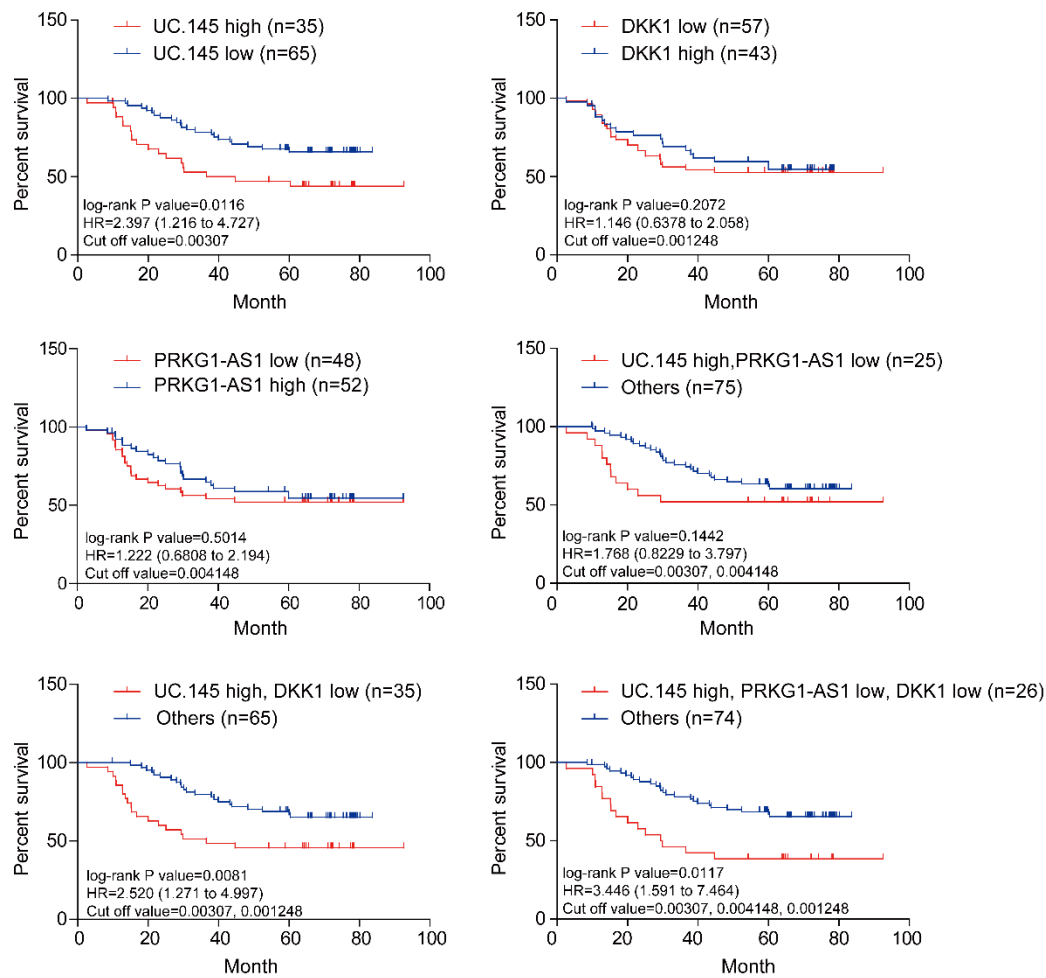

**Figure S11.** Survival analysis of UC.145, *DKK1*, and PRKG1-AS1. Kaplan–Meier estimates of patient overall survival using the number of cases in which each gene was either upregulated or downregulated.



## Supplementary Tables

**Table S1.** Primer sequences used in this study.

| Primer Name                  | Direction | Sequences (5' to 3')         |
|------------------------------|-----------|------------------------------|
| Primer Sequences for qRT-PCR |           |                              |
| UC.145                       | Forward   | TTTCACTGCTGCTTGGTGTC         |
|                              | Reverse   | AGCCGGCACTAATAGTCCAA         |
| UC.419                       | Forward   | TCAAAGACACGAAGGGAATG         |
|                              | Reverse   | TTTTTAATTCAAACGTGTTTGTTTCAGA |
| UC.456                       | Forward   | CAGGGTGATGGTGAGGATTC         |
|                              | Reverse   | TGAGGTTTTTGGTGGTGGTT         |
| UC.320                       | Forward   | CAGGATATCACTGTGCAGAAATG      |
|                              | Reverse   | CCTTGGGTGTCAAAAATGG          |
| UC.281                       | Forward   | CCGAATCCCTCTGTTGGTTA         |
|                              | Reverse   | TGAGGCCTTTATTGGAATTCTG       |
| UC.208                       | Forward   | TGGTTAGACAACACCCTCCAG        |
|                              | Reverse   | GGTGATCTGGTTCAAGTAGGG        |
| UC.12                        | Forward   | CAGTTCATTATAAGTAGTTGATGTCCA  |
|                              | Reverse   | GTGGATCGACTCATTGGTGA         |
| UC.330                       | Forward   | GTTCCGACCGGCGTTTAG           |
|                              | Reverse   | ACGGTAATCCAGCGAGGACT         |
| UC.186                       | Forward   | GGTGAATGGTATGCTTTCAACA       |
|                              | Reverse   | ATGCATCCTGTGTTTCAGCAA        |
| UC.61                        | Forward   | CGCCCATGAAACAAAAACA          |
|                              | Reverse   | GGGTGTCTTCCTGTGCAACT         |
| UC.209                       | Forward   | TGATTTATCTTCCACATTCTTGGA     |
|                              | Reverse   | TTTATAATCCCCACGTGCTT         |
| UC.443                       | Forward   | CTTGGCTTTTCTCCCTTGGT         |
|                              | Reverse   | ACCCTTGACTTTCCTTCAGC         |
| UC.46                        | Forward   | GGTCTTTACCTTATTGTACATTAGACC  |
|                              | Reverse   | CATGCCAAATTGCTTTTGCT         |
| UC.366                       | Forward   | AAAAATAAGGAGCCTTCTATTAAATCA  |
|                              | Reverse   | AGTGTACTGGGCCTTGGAGA         |
| UC.48                        | Forward   | ATGGGTGCTAGGCTGCTACT         |
|                              | Reverse   | TTTCTTCTTCAGTTGGCAGTTC       |
| UC.18                        | Forward   | GGAAAAGAGAAAAAGAGAAAGAAAAA   |
|                              | Reverse   | CATTTCCAGTGAAACCCACA         |
| UC.163                       | Forward   | GGGCAATTTTCTGTCTTCTTG        |
|                              | Reverse   | CATTTGGGATCCCCAGTTTC         |
| UC.263                       | Forward   | CACTGCTGTCTGGGACTGAA         |
|                              | Reverse   | TGCCAAACGGGTACCATACT         |
| UC.236                       | Forward   | GCCCTGCTTTGTAGAGCAT          |
|                              | Reverse   | TTATCATCGCTGGGGAGAAC         |
| UC.218                       | Forward   | GCAAATTGCACTCTCTGCTCT        |
|                              | Reverse   | CTTCCCTTTCAAGCCCTCTA         |
| UC.214                       | Forward   | CAGAGACCCCTCTGCCTTTA         |
|                              | Reverse   | TCAATGTTCCCTGCCCTTTT         |
| UC.264                       | Forward   | CACTGCTGTCTGGGACTGAA         |
|                              | Reverse   | TGCCAAACGGGTACCATACT         |
| UC.283                       | Forward   | GGATCAAATCACATAAACTGCAA      |

|                       |         |                            |
|-----------------------|---------|----------------------------|
| UC.158                | Reverse | CGCCAGGGAAGCACTTAATA       |
|                       | Forward | ATCAGGCAGTTGGAAGCTCT       |
| UC.152                | Reverse | AGCCGCTCTCATTACAAACG       |
|                       | Forward | AATGCCATAATGCCTCTCTGA      |
| <i>IGFBP3</i>         | Reverse | CTTTTAATGGCAGATTATCCCTGT   |
|                       | Forward | AGTTGGGGGAATTAGGATGG       |
| <i>GADD45G</i>        | Reverse | AATGGATTGGCAGCTGTTC        |
|                       | Forward | TACGCTGATCCAGGCTTTCT       |
| <i>NGFR</i>           | Reverse | ACTCACCGAAATGAGGATGC       |
|                       | Forward | AGCTCTGGGACAAGAGACCA       |
| <i>GNG4</i>           | Reverse | CCATGTTGACACCTGAAACG       |
|                       | Forward | GCTTGAAAAACCTGCCTCAG       |
| <i>SMAD9</i>          | Reverse | GGGTGCATGTGTGAAAACAG       |
|                       | Forward | GCTTGTTTGGGTCCAAGTGT       |
| <i>DKK1</i>           | Reverse | AGCAGCAGTGGTAAGGGAGA       |
|                       | Forward | TTGAGAAGGGGGATGATGAG       |
| <i>LIFR</i>           | Reverse | CCAGTCTGGCAAACTGTGA        |
|                       | Forward | CCAGTCCGTGGAGACATTTT       |
| <i>SOSC2</i>          | Reverse | GGTGTGCCAATTAGGCTTGT       |
|                       | Forward | AAGGCTGAAGTCGCGTTTTA       |
| <i>PDGFRA</i>         | Reverse | AGTGAGGCCTGTGTCAGCTT       |
|                       | Forward | TGGCTTCCTGGAGCTTAAAA       |
| <i>DTX3</i>           | Reverse | GAGTACCCTGGGGCACACTA       |
|                       | Forward | TCTGTTTGAGCTGCATTTGG       |
| <i>LAMA5</i>          | Reverse | TCCCAAGTCTGGCATTTAGG       |
|                       | Forward | CAGCCCCAAGCTGTCTACTC       |
| <i>IGF1</i>           | Reverse | GGCAGTGGTCACCTTTTGTT       |
|                       | Forward | AGTCCCGCCAAAACACTATG       |
| <i>CDKN1A</i>         | Reverse | ATTTACAACCGCAGGGAGTG       |
|                       | Forward | CTTCAAGGCAGTGGGAGAAG       |
| <i>CREB5</i>          | Reverse | TCTAAGCCCCACTGCTGTCT       |
|                       | Forward | TTGAGCTGACGCTGAAGAGA       |
| <i>EZH2</i>           | Reverse | AGGGACACAGTTGGGTTCTG       |
|                       | Forward | CAGTCACAGAGCCATGAGGA       |
| <i>DKK1 PROMOTER</i>  | Reverse | CCCAGCATCTAGCAGTGTCA       |
|                       | Forward | TGCTTTTGAGAGCCTATCA        |
| <i>PRKG1-AS1</i>      | Reverse | GCAGGAAGTCTGGGAAGTTG       |
|                       | Forward | ACCTTTTACGGCCACATCAG       |
| <i>ACTB</i>           | Reverse | TGGCTGGTCCACATTGAATA       |
|                       | Forward | GATGAGATTGGCATGGCTTT       |
| <i>GAPDH</i>          | Reverse | CACCTTCACCGTTCCAGTTT       |
|                       | Forward | CCGGGAAACTGTGGCGTGATGG     |
| <i>U6</i>             | Reverse | AGGTGGAGGAGTGGGTGTCGCTGTT  |
|                       | Forward | CTCGCTTCGGCAGCACA          |
| <b>MS-PCR primers</b> |         |                            |
| <i>DKK1_M</i>         | Reverse | AACGCTTCAGGAATTTGCGT       |
|                       | Forward | TTTGAATTCGGTTTTTAATTTAAC   |
| <i>DKK1_UM</i>        | Reverse | CAATAATCTAATACTTATCCCCGCC  |
|                       | Forward | TGAATTTGGTTTTTAATTTAATGT   |
|                       | Reverse | TCAATAATCTAATACTTATCCCCACC |
|                       | Forward |                            |

**Table S2.** Nanostring nCounter expression results.

| Gene Name       | Accession No.  | Probe Name          | Class        | %CV    | Fold Change<br>(siUC.145/siCT) |
|-----------------|----------------|---------------------|--------------|--------|--------------------------------|
| <i>ABL1</i>     | NM_005157.3    | NM_005157.3:3200    | Endogenous   | 32.39  | 1.80                           |
| <i>ACAD9</i>    | NM_014049.4    | NM_014049.4:1935    | Housekeeping | 10.18  | -1.19                          |
| <i>ACVR1B</i>   | NM_004302.3    | NM_004302.3:1700    | Endogenous   | 25.93  | -1.92                          |
| <i>ACVR1C</i>   | NM_145259.2    | NM_145259.2:5168    | Endogenous   | 32.04  | -1.71                          |
| <i>ACVR2A</i>   | NM_001616.3    | NM_001616.3:1245    | Endogenous   | 43.35  | 2.19                           |
| <i>AGK</i>      | NM_018238.3    | NM_018238.3:816     | Housekeeping | 16.61  | -1.01                          |
| <i>AKT1</i>     | NM_005163.2    | NM_005163.2:1772    | Endogenous   | 50.07  | 2.12                           |
| <i>AKT2</i>     | NM_001626.2    | NM_001626.2:1450    | Endogenous   | 20.65  | 1.28                           |
| <i>AKT3</i>     | NM_181690.1    | NM_181690.1:755     | Endogenous   | 65.13  | -6.04                          |
| <i>ALK</i>      | NM_004304.3    | NM_004304.3:3495    | Endogenous   | 52.10  | 1.22                           |
| <i>ALKBH2</i>   | NM_001001655.2 | NM_001001655.2:907  | Endogenous   | 13.10  | -1.44                          |
| <i>ALKBH3</i>   | NM_139178.3    | NM_139178.3:690     | Endogenous   | 27.22  | 1.83                           |
| <i>AMER1</i>    | NM_152424.3    | NM_152424.3:5755    | Endogenous   | 24.37  | 1.62                           |
| <i>AMH</i>      | NM_000479.3    | NM_000479.3:1626    | Endogenous   | 46.10  | 1.56                           |
| <i>AMMECR1L</i> | NM_001199140.1 | NM_001199140.1:3564 | Housekeeping | 6.39   | -1.06                          |
| <i>ANGPT1</i>   | NM_001146.3    | NM_001146.3:2080    | Endogenous   | 51.31  | -3.04                          |
| <i>APC</i>      | NM_000038.3    | NM_000038.3:6850    | Endogenous   | 24.26  | 1.41                           |
| <i>APH1B</i>    | NM_001145646.1 | NM_001145646.1:2930 | Endogenous   | 52.46  | 3.13                           |
| <i>AR</i>       | NM_001011645.1 | NM_001011645.1:810  | Endogenous   | 53.28  | -1.12                          |
| <i>ARID1A</i>   | NM_006015.4    | NM_006015.4:5495    | Endogenous   | 7.85   | 1.18                           |
| <i>ARID1B</i>   | NM_020732.3    | NM_020732.3:6335    | Endogenous   | 10.05  | 1.07                           |
| <i>ARID2</i>    | NM_152641.2    | NM_152641.2:3355    | Endogenous   | 43.54  | 1.66                           |
| <i>ARNT2</i>    | NM_014862.3    | NM_014862.3:5260    | Endogenous   | 21.01  | 1.17                           |
| <i>ASXL1</i>    | NM_001164603.1 | NM_001164603.1:472  | Endogenous   | 2.24   | -1.01                          |
| <i>ATM</i>      | NM_138292.3    | NM_138292.3:6688    | Endogenous   | 33.13  | -2.53                          |
| <i>ATR</i>      | NM_001184.2    | NM_001184.2:565     | Endogenous   | 17.10  | -1.41                          |
| <i>ATRX</i>     | NM_000489.3    | NM_000489.3:139     | Endogenous   | 2.31   | -1.15                          |
| <i>AXIN1</i>    | NM_181050.1    | NM_181050.1:135     | Endogenous   | 11.28  | -1.14                          |
| <i>AXIN2</i>    | NM_004655.3    | NM_004655.3:1035    | Endogenous   | 116.54 | 5.74                           |
| <i>B2M</i>      | NM_004048.2    | NM_004048.2:25      | Endogenous   | 41.88  | -1.06                          |
| <i>BAD</i>      | NM_004322.3    | NM_004322.3:652     | Endogenous   | 29.69  | -1.85                          |
| <i>BAIAP3</i>   | NM_003933.4    | NM_003933.4:1950    | Endogenous   | 60.37  | -8.23                          |
| <i>BAMBI</i>    | NM_012342.2    | NM_012342.2:832     | Endogenous   | 104.57 | 4.48                           |
| <i>BAP1</i>     | NM_004656.2    | NM_004656.2:240     | Endogenous   | 46.24  | 2.12                           |
| <i>BAX</i>      | NM_138761.3    | NM_138761.3:342     | Endogenous   | 72.17  | 2.76                           |
| <i>BCL2</i>     | NM_000657.2    | NM_000657.2:5       | Endogenous   | 56.78  | -2.30                          |

|                 |                |                     |              |        |       |
|-----------------|----------------|---------------------|--------------|--------|-------|
| <i>BCL2A1</i>   | NM_004049.2    | NM_004049.2:80      | Endogenous   | 16.84  | -1.28 |
| <i>BCL2L1</i>   | NM_138578.1    | NM_138578.1:1560    | Endogenous   | 6.66   | 1.29  |
| <i>BCOR</i>     | NM_001123383.1 | NM_001123383.1:1630 | Endogenous   | 21.52  | 1.34  |
| <i>BDNF</i>     | NM_170732.4    | NM_170732.4:730     | Endogenous   | 30.11  | -2.74 |
| <i>BID</i>      | NM_197966.1    | NM_197966.1:2095    | Endogenous   | 30.81  | -1.95 |
| <i>BIRC3</i>    | NM_182962.1    | NM_182962.1:3       | Endogenous   | 46.06  | 1.56  |
| <i>BIRC7</i>    | NM_022161.2    | NM_022161.2:1168    | Endogenous   | 47.72  | 2.34  |
| <i>BMP2</i>     | NM_001200.2    | NM_001200.2:1515    | Endogenous   | 109.44 | 10.42 |
| <i>BMP4</i>     | NM_001202.2    | NM_001202.2:490     | Endogenous   | 90.74  | 3.25  |
| <i>BMP5</i>     | NM_021073.2    | NM_021073.2:1570    | Endogenous   | 42.63  | 1.25  |
| <i>BMP6</i>     | NM_001718.2    | NM_001718.2:1045    | Endogenous   | 89.41  | -1.28 |
| <i>BMP7</i>     | NM_001719.1    | NM_001719.1:525     | Endogenous   | 59.25  | -4.40 |
| <i>BMP8A</i>    | NM_181809.3    | NM_181809.3:5015    | Endogenous   | 22.53  | 3.13  |
| <i>BMPR1B</i>   | NM_001203.1    | NM_001203.1:430     | Endogenous   | 23.98  | 1.34  |
| <i>BNIP3</i>    | NM_004052.2    | NM_004052.2:325     | Endogenous   | 19.85  | 2.34  |
| <i>BRAF</i>     | NM_004333.3    | NM_004333.3:565     | Endogenous   | 18.67  | -1.12 |
| <i>BRCA1</i>    | NM_007305.2    | NM_007305.2:1275    | Endogenous   | 7.86   | -1.32 |
| <i>BRCA2</i>    | NM_000059.3    | NM_000059.3:115     | Endogenous   | 26.62  | 1.30  |
| <i>BRIP1</i>    | NM_032043.1    | NM_032043.1:1130    | Endogenous   | 13.61  | -1.10 |
| <i>C10orf76</i> | NM_024541.2    | NM_024541.2:3750    | Housekeeping | 3.43   | 1.20  |
| <i>C19orf40</i> | NM_152266.3    | NM_152266.3:376     | Endogenous   | 5.15   | -1.17 |
| <i>CACNA1C</i>  | NM_199460.2    | NM_199460.2:4785    | Endogenous   | 56.90  | 2.08  |
| <i>CACNA1D</i>  | NM_000720.2    | NM_000720.2:5195    | Endogenous   | 100.52 | 4.17  |
| <i>CACNA1E</i>  | NM_000721.2    | NM_000721.2:9325    | Endogenous   | 61.03  | 1.25  |
| <i>CACNA1G</i>  | NM_198397.1    | NM_198397.1:1380    | Endogenous   | 67.22  | -6.40 |
| <i>CACNA1H</i>  | NM_021098.2    | NM_021098.2:3329    | Endogenous   | 45.07  | -2.24 |
| <i>CACNA2D1</i> | NM_000722.2    | NM_000722.2:335     | Endogenous   | 48.27  | -1.54 |
| <i>CACNA2D2</i> | NM_001005505.1 | NM_001005505.1:2045 | Endogenous   | 61.74  | -1.28 |
| <i>CACNA2D3</i> | NM_018398.2    | NM_018398.2:205     | Endogenous   | 29.99  | -1.92 |
| <i>CACNA2D4</i> | NM_001005737.1 | NM_001005737.1:990  | Endogenous   | 56.53  | -1.28 |
| <i>CACNB2</i>   | NM_000724.3    | NM_000724.3:2610    | Endogenous   | 28.18  | -1.49 |
| <i>CACNB3</i>   | NM_000725.2    | NM_000725.2:1115    | Endogenous   | 27.03  | -1.08 |
| <i>CACNB4</i>   | NM_001005747.2 | NM_001005747.2:1483 | Endogenous   | 29.99  | -2.24 |
| <i>CACNG1</i>   | NM_000727.2    | NM_000727.2:464     | Endogenous   | 61.03  | 3.13  |
| <i>CACNG4</i>   | NM_014405.2    | NM_014405.2:1030    | Endogenous   | 20.25  | -1.12 |
| <i>CACNG6</i>   | NM_145814.1    | NM_145814.1:1745    | Endogenous   | 55.44  | -4.18 |
| <i>CALML3</i>   | NM_005185.2    | NM_005185.2:685     | Endogenous   | 57.73  | -5.12 |
| <i>CALML5</i>   | NM_017422.4    | NM_017422.4:136     | Endogenous   | 11.51  | 1.56  |
| <i>CALML6</i>   | NM_138705.2    | NM_138705.2:682     | Endogenous   | 44.09  | 2.34  |
| <i>CAMK2B</i>   | NM_001220.3    | NM_001220.3:365     | Endogenous   | 71.62  | -3.84 |

|               |                |                    |              |        |       |
|---------------|----------------|--------------------|--------------|--------|-------|
| <i>CAPN2</i>  | NM_001748.4    | NM_001748.4:2085   | Endogenous   | 29.01  | 1.68  |
| <i>CARD11</i> | NM_032415.2    | NM_032415.2:1075   | Endogenous   | 15.87  | -1.22 |
| <i>CASP10</i> | NM_032977.3    | NM_032977.3:20     | Endogenous   | 10.12  | 1.56  |
| <i>CASP12</i> | NM_001191016.1 | NM_001191016.1:595 | Endogenous   | 18.17  | 1.56  |
| <i>CASP3</i>  | NM_032991.2    | NM_032991.2:685    | Endogenous   | 4.79   | 1.09  |
| <i>CASP7</i>  | NM_001227.3    | NM_001227.3:915    | Endogenous   | 16.12  | 1.11  |
| <i>CASP8</i>  | NM_001228.4    | NM_001228.4:301    | Endogenous   | 11.83  | -1.10 |
| <i>CASP9</i>  | NM_001229.2    | NM_001229.2:1805   | Endogenous   | 31.92  | -1.05 |
| <i>CBL</i>    | NM_005188.2    | NM_005188.2:7485   | Endogenous   | 20.99  | -1.12 |
| <i>CBLC</i>   | NM_012116.3    | NM_012116.3:652    | Endogenous   | 19.11  | -1.18 |
| <i>CC2D1B</i> | NM_032449.2    | NM_032449.2:4182   | Housekeeping | 18.85  | 1.12  |
| <i>CCNA1</i>  | NM_003914.3    | NM_003914.3:1605   | Endogenous   | 47.66  | 1.17  |
| <i>CCNA2</i>  | NM_001237.2    | NM_001237.2:1210   | Endogenous   | 15.06  | -1.42 |
| <i>CCNB1</i>  | NM_031966.2    | NM_031966.2:715    | Endogenous   | 8.75   | -1.34 |
| <i>CCNB3</i>  | NM_033671.1    | NM_033671.1:35     | Endogenous   | 22.18  | -1.28 |
| <i>CCND1</i>  | NM_053056.2    | NM_053056.2:690    | Endogenous   | 17.55  | 1.16  |
| <i>CCND2</i>  | NM_001759.2    | NM_001759.2:5825   | Endogenous   | 70.20  | -5.63 |
| <i>CCND3</i>  | NM_001760.2    | NM_001760.2:1215   | Endogenous   | 24.60  | -1.62 |
| <i>CCNE1</i>  | NM_001238.1    | NM_001238.1:1635   | Endogenous   | 76.76  | 2.95  |
| <i>CCNE2</i>  | NM_057735.1    | NM_057735.1:50     | Endogenous   | 42.95  | 2.61  |
| <i>CCNO</i>   | NM_021147.3    | NM_021147.3:45     | Endogenous   | 10.12  | -1.28 |
| <i>CCR7</i>   | NM_001838.2    | NM_001838.2:1610   | Endogenous   | 15.87  | -1.28 |
| <i>CD14</i>   | NM_000591.2    | NM_000591.2:885    | Endogenous   | 54.97  | -1.28 |
| <i>CD19</i>   | NM_001770.4    | NM_001770.4:1770   | Endogenous   | 50.96  | 1.56  |
| <i>CD40</i>   | NM_001250.4    | NM_001250.4:1265   | Endogenous   | 115.37 | 2.34  |
| <i>CDC14A</i> | NM_033313.2    | NM_033313.2:1400   | Endogenous   | 13.58  | -1.16 |
| <i>CDC14B</i> | NM_003671.3    | NM_003671.3:4940   | Endogenous   | 69.15  | 2.67  |
| <i>CDC25A</i> | NM_001789.2    | NM_001789.2:690    | Endogenous   | 68.12  | 2.01  |
| <i>CDC25B</i> | NM_021873.2    | NM_021873.2:3045   | Endogenous   | 5.32   | -1.27 |
| <i>CDC25C</i> | NM_001790.2    | NM_001790.2:1055   | Endogenous   | 45.84  | -2.46 |
| <i>CDC6</i>   | NM_001254.3    | NM_001254.3:1300   | Endogenous   | 13.42  | 1.15  |
| <i>CDC7</i>   | NM_003503.2    | NM_003503.2:805    | Endogenous   | 18.70  | -1.85 |
| <i>CDH1</i>   | NM_004360.2    | NM_004360.2:1230   | Endogenous   | 59.18  | -3.72 |
| <i>CDK2</i>   | NM_001798.2    | NM_001798.2:220    | Endogenous   | 33.23  | -2.30 |
| <i>CDK4</i>   | NM_000075.2    | NM_000075.2:1055   | Endogenous   | 5.12   | -1.05 |
| <i>CDK6</i>   | NM_001259.5    | NM_001259.5:15     | Endogenous   | 62.10  | 1.63  |
| <i>CDKN1A</i> | NM_000389.2    | NM_000389.2:1975   | Endogenous   | 68.32  | 2.68  |
| <i>CDKN1B</i> | NM_004064.2    | NM_004064.2:365    | Endogenous   | 12.30  | 1.10  |
| <i>CDKN1C</i> | NM_000076.2    | NM_000076.2:1605   | Endogenous   | 43.87  | -2.88 |
| <i>CDKN2A</i> | NM_000077.3    | NM_000077.3:975    | Endogenous   | 46.11  | -2.56 |

|                |                |                     |              |        |       |
|----------------|----------------|---------------------|--------------|--------|-------|
| <i>CDKN2B</i>  | NM_004936.3    | NM_004936.3:1175    | Endogenous   | 89.06  | 5.59  |
| <i>CDKN2C</i>  | NM_001262.2    | NM_001262.2:1295    | Endogenous   | 11.28  | -1.44 |
| <i>CDKN2D</i>  | NM_001800.3    | NM_001800.3:870     | Endogenous   | 41.77  | -2.95 |
| <i>CEBPA</i>   | NM_004364.2    | NM_004364.2:1320    | Endogenous   | 72.78  | 2.41  |
| <i>CEBPE</i>   | NM_001805.2    | NM_001805.2:1096    | Endogenous   | 74.07  | -2.56 |
| <i>CHAD</i>    | NM_001267.2    | NM_001267.2:810     | Endogenous   | 25.94  | -1.92 |
| <i>CHEK1</i>   | NM_001114121.1 | NM_001114121.1:2225 | Endogenous   | 20.36  | -1.99 |
| <i>CHEK2</i>   | NM_007194.3    | NM_007194.3:140     | Endogenous   | 33.78  | -2.11 |
| <i>CHUK</i>    | NM_001278.3    | NM_001278.3:860     | Endogenous   | 12.11  | 1.26  |
| <i>CIC</i>     | NM_015125.3    | NM_015125.3:1290    | Endogenous   | 29.84  | 1.36  |
| <i>CLCF1</i>   | NM_013246.2    | NM_013246.2:1296    | Endogenous   | 28.25  | 2.34  |
| <i>CNOT10</i>  | NM_001256741.1 | NM_001256741.1:1962 | Housekeeping | 12.26  | 1.00  |
| <i>CNOT4</i>   | NM_001190848.1 | NM_001190848.1:795  | Housekeeping | 7.21   | 1.16  |
| <i>CNTFR</i>   | NM_147164.1    | NM_147164.1:784     | Endogenous   | 28.79  | -1.65 |
| <i>COG7</i>    | NM_153603.3    | NM_153603.3:1492    | Housekeeping | 37.92  | -2.08 |
| <i>COL11A1</i> | NM_001854.3    | NM_001854.3:674     | Endogenous   | 19.31  | -1.28 |
| <i>COL11A2</i> | NM_001163771.1 | NM_001163771.1:760  | Endogenous   | 52.19  | -6.40 |
| <i>COL1A1</i>  | NM_000088.3    | NM_000088.3:5210    | Endogenous   | 34.04  | -2.21 |
| <i>COL1A2</i>  | NM_000089.3    | NM_000089.3:2635    | Endogenous   | 57.58  | 1.17  |
| <i>COL24A1</i> | NM_152890.5    | NM_152890.5:4752    | Endogenous   | 47.22  | -1.92 |
| <i>COL27A1</i> | NM_032888.2    | NM_032888.2:5120    | Endogenous   | 131.64 | 6.54  |
| <i>COL2A1</i>  | NM_001844.4    | NM_001844.4:4745    | Endogenous   | 17.34  | -1.04 |
| <i>COL3A1</i>  | NM_000090.3    | NM_000090.3:180     | Endogenous   | 30.11  | 2.34  |
| <i>COL4A3</i>  | NM_000091.3    | NM_000091.3:5630    | Endogenous   | 39.31  | -1.92 |
| <i>COL4A4</i>  | NM_000092.4    | NM_000092.4:8255    | Endogenous   | 12.31  | 1.95  |
| <i>COL4A5</i>  | NM_033381.1    | NM_033381.1:5360    | Endogenous   | 145.81 | 8.54  |
| <i>COL4A6</i>  | NM_001847.2    | NM_001847.2:1070    | Endogenous   | 14.80  | 1.35  |
| <i>COL5A1</i>  | NM_000093.3    | NM_000093.3:6345    | Endogenous   | 31.94  | -1.02 |
| <i>COL5A2</i>  | NM_000393.3    | NM_000393.3:4075    | Endogenous   | 32.95  | -1.92 |
| <i>COL6A6</i>  | NM_001102608.1 | NM_001102608.1:5926 | Endogenous   | 15.87  | -1.28 |
| <i>COMP</i>    | NM_000095.2    | NM_000095.2:1744    | Endogenous   | 42.13  | 2.34  |
| <i>CREB3L1</i> | NM_052854.1    | NM_052854.1:195     | Endogenous   | 63.35  | 2.27  |
| <i>CREB3L3</i> | NM_001271995.1 | NM_001271995.1:1050 | Endogenous   | 82.23  | 1.37  |
| <i>CREB3L4</i> | NM_130898.2    | NM_130898.2:1505    | Endogenous   | 36.40  | -1.37 |
| <i>CREB5</i>   | NM_182898.2    | NM_182898.2:1885    | Endogenous   | 65.35  | 3.56  |
| <i>CREBBP</i>  | NM_004380.2    | NM_004380.2:8855    | Endogenous   | 57.13  | 1.30  |
| <i>CRLF2</i>   | NM_001012288.1 | NM_001012288.1:605  | Endogenous   | 15.91  | -1.60 |
| <i>CSF1R</i>   | NM_005211.2    | NM_005211.2:3775    | Endogenous   | 16.56  | -1.28 |
| <i>CSF2</i>    | NM_000758.2    | NM_000758.2:475     | Endogenous   | 64.06  | 2.34  |
| <i>CSF3</i>    | NM_000759.3    | NM_000759.3:851     | Endogenous   | 35.31  | -1.28 |

|                 |                |                     |              |        |       |
|-----------------|----------------|---------------------|--------------|--------|-------|
| <i>CSF3R</i>    | NM_156038.2    | NM_156038.2:90      | Endogenous   | 64.94  | 1.56  |
| <i>CTNNB1</i>   | NM_001904.3    | NM_001904.3:2265    | Endogenous   | 6.22   | -1.10 |
| <i>CUL1</i>     | NM_003592.2    | NM_003592.2:1487    | Endogenous   | 10.39  | -1.20 |
| <i>CXXC4</i>    | NM_025212.1    | NM_025212.1:293     | Endogenous   | 56.34  | 1.17  |
| <i>CYLD</i>     | NM_015247.1    | NM_015247.1:2890    | Endogenous   | 46.64  | -2.88 |
| <i>DAXX</i>     | NM_001350.3    | NM_001350.3:1875    | Endogenous   | 1.40   | -1.14 |
| <i>DDB2</i>     | NM_000107.1    | NM_000107.1:840     | Endogenous   | 89.74  | 3.11  |
| <i>DDIT3</i>    | NM_004083.4    | NM_004083.4:40      | Endogenous   | 22.71  | -1.41 |
| <i>DDIT4</i>    | NM_019058.2    | NM_019058.2:85      | Endogenous   | 67.66  | -5.87 |
| <i>DDX50</i>    | NM_024045.1    | NM_024045.1:1185    | Housekeeping | 5.77   | -1.26 |
| <i>DHX16</i>    | NM_001164239.1 | NM_001164239.1:2490 | Housekeeping | 8.09   | -1.26 |
| <i>DKK1</i>     | NM_012242.2    | NM_012242.2:75      | Endogenous   | 166.87 | 49.67 |
| <i>DKK2</i>     | NM_014421.2    | NM_014421.2:1135    | Endogenous   | 38.46  | -1.28 |
| <i>DKK4</i>     | NM_014420.2    | NM_014420.2:640     | Endogenous   | 41.87  | 1.30  |
| <i>DLL1</i>     | NM_005618.3    | NM_005618.3:2580    | Endogenous   | 45.87  | -1.28 |
| <i>DLL3</i>     | NM_203486.2    | NM_203486.2:1842    | Endogenous   | 72.50  | -7.25 |
| <i>DLL4</i>     | NM_019074.2    | NM_019074.2:893     | Endogenous   | 53.11  | 2.34  |
| <i>DNAJC14</i>  | NM_032364.5    | NM_032364.5:1166    | Housekeeping | 17.03  | -1.31 |
| <i>DNMT1</i>    | NM_001379.2    | NM_001379.2:1495    | Endogenous   | 12.97  | -1.26 |
| <i>DNMT3A</i>   | NM_022552.3    | NM_022552.3:3835    | Endogenous   | 29.65  | 1.52  |
| <i>DTX1</i>     | NM_004416.2    | NM_004416.2:2855    | Endogenous   | 34.79  | 1.17  |
| <i>DTX3</i>     | NM_178502.2    | NM_178502.2:1620    | Endogenous   | 124.18 | 14.06 |
| <i>DTX4</i>     | NM_015177.1    | NM_015177.1:4820    | Endogenous   | 17.76  | 1.07  |
| <i>DUSP10</i>   | NM_144728.2    | NM_144728.2:1176    | Endogenous   | 10.35  | 1.49  |
| <i>DUSP2</i>    | NM_004418.3    | NM_004418.3:1235    | Endogenous   | 123.67 | 7.97  |
| <i>DUSP4</i>    | NM_057158.2    | NM_057158.2:3115    | Endogenous   | 113.52 | 9.38  |
| <i>DUSP5</i>    | NM_004419.3    | NM_004419.3:675     | Endogenous   | 40.64  | 1.56  |
| <i>DUSP6</i>    | NM_001946.2    | NM_001946.2:1535    | Endogenous   | 12.23  | -1.68 |
| <i>DUSP8</i>    | NM_004420.2    | NM_004420.2:2165    | Endogenous   | 63.41  | 4.93  |
| <i>E2F1</i>     | NM_005225.1    | NM_005225.1:935     | Endogenous   | 19.61  | -1.91 |
| <i>E2F5</i>     | NM_001951.3    | NM_001951.3:444     | Endogenous   | 53.58  | 2.38  |
| <i>EDC3</i>     | NM_001142443.1 | NM_001142443.1:925  | Housekeeping | 17.11  | -1.23 |
| <i>EFNA1</i>    | NM_004428.2    | NM_004428.2:650     | Endogenous   | 62.37  | 2.99  |
| <i>EFNA2</i>    | NM_001405.3    | NM_001405.3:1538    | Endogenous   | 92.05  | 2.59  |
| <i>EFNA3</i>    | NM_004952.4    | NM_004952.4:1672    | Endogenous   | 23.81  | 1.21  |
| <i>EFNA5</i>    | NM_001962.2    | NM_001962.2:5035    | Endogenous   | 20.37  | -1.60 |
| <i>EGF</i>      | NM_001963.3    | NM_001963.3:3930    | Endogenous   | 67.69  | -3.20 |
| <i>EGFR</i>     | NM_201282.1    | NM_201282.1:360     | Endogenous   | 40.36  | -2.39 |
| <i>EIF2B4</i>   | NM_172195.3    | NM_172195.3:1390    | Housekeeping | 7.37   | 1.24  |
| <i>EIF4EBP1</i> | NM_004095.3    | NM_004095.3:363     | Endogenous   | 27.52  | -1.93 |

|              |                |                     |              |       |       |
|--------------|----------------|---------------------|--------------|-------|-------|
| <i>ENDOG</i> | NM_004435.2    | NM_004435.2:694     | Endogenous   | 4.66  | 1.06  |
| <i>EP300</i> | NM_001429.2    | NM_001429.2:715     | Endogenous   | 32.80 | -1.79 |
| <i>EPHA2</i> | NM_004431.2    | NM_004431.2:1525    | Endogenous   | 32.13 | 1.80  |
| <i>EPO</i>   | NM_000799.2    | NM_000799.2:1055    | Endogenous   | 20.49 | 1.17  |
| <i>EPOR</i>  | NM_000121.2    | NM_000121.2:1295    | Endogenous   | 16.54 | -1.06 |
| <i>ERBB2</i> | NM_004448.2    | NM_004448.2:2380    | Endogenous   | 11.50 | 1.11  |
| <i>ERCC2</i> | NM_000400.2    | NM_000400.2:240     | Endogenous   | 35.62 | 1.74  |
| <i>ERCC3</i> | NM_000122.1    | NM_000122.1:1950    | Housekeeping | 16.48 | 1.09  |
| <i>ERCC6</i> | NM_000124.2    | NM_000124.2:3235    | Endogenous   | 37.82 | 2.02  |
| <i>ETS2</i>  | NM_005239.4    | NM_005239.4:1175    | Endogenous   | 28.97 | 1.45  |
| <i>ETV1</i>  | NM_004956.4    | NM_004956.4:1719    | Endogenous   | 22.00 | -1.60 |
| <i>ETV4</i>  | NM_001079675.1 | NM_001079675.1:1535 | Endogenous   | 46.30 | -2.94 |
| <i>ETV7</i>  | NM_016135.2    | NM_016135.2:794     | Endogenous   | 20.64 | -2.13 |
| <i>EYA1</i>  | NM_172059.2    | NM_172059.2:1090    | Endogenous   | 24.20 | -1.28 |
| <i>EZH2</i>  | NM_004456.3    | NM_004456.3:190     | Endogenous   | 14.83 | -1.58 |
| <i>FANCA</i> | NM_000135.2    | NM_000135.2:265     | Endogenous   | 64.69 | 3.02  |
| <i>FANCB</i> | NM_152633.2    | NM_152633.2:2470    | Endogenous   | 11.90 | 1.10  |
| <i>FANCC</i> | NM_000136.2    | NM_000136.2:310     | Endogenous   | 8.64  | -1.19 |
| <i>FANCE</i> | NM_021922.2    | NM_021922.2:1275    | Endogenous   | 29.76 | -1.78 |
| <i>FANCF</i> | NM_022725.2    | NM_022725.2:845     | Endogenous   | 6.53  | -1.01 |
| <i>FANCG</i> | NM_004629.1    | NM_004629.1:1900    | Endogenous   | 37.36 | -2.38 |
| <i>FANCL</i> | NM_001114636.1 | NM_001114636.1:446  | Endogenous   | 26.08 | -1.67 |
| <i>FAS</i>   | NM_152876.1    | NM_152876.1:1740    | Endogenous   | 98.98 | 3.05  |
| <i>FASLG</i> | NM_000639.1    | NM_000639.1:625     | Endogenous   | 24.53 | 1.30  |
| <i>FBXW7</i> | NM_018315.4    | NM_018315.4:1480    | Endogenous   | 18.58 | -1.06 |
| <i>FCF1</i>  | NM_015962.4    | NM_015962.4:1022    | Housekeeping | 11.58 | 1.96  |
| <i>FEN1</i>  | NM_004111.4    | NM_004111.4:425     | Endogenous   | 12.75 | -1.38 |
| <i>FGF1</i>  | NM_033137.1    | NM_033137.1:315     | Endogenous   | 80.08 | 1.76  |
| <i>FGF10</i> | NM_004465.1    | NM_004465.1:85      | Endogenous   | 19.71 | 1.04  |
| <i>FGF11</i> | NM_004112.2    | NM_004112.2:1670    | Endogenous   | 10.40 | -1.00 |
| <i>FGF12</i> | NM_004113.4    | NM_004113.4:685     | Endogenous   | 53.11 | -3.61 |
| <i>FGF13</i> | NM_033642.1    | NM_033642.1:620     | Endogenous   | 19.71 | 3.13  |
| <i>FGF14</i> | NM_004115.3    | NM_004115.3:725     | Endogenous   | 10.12 | -1.92 |
| <i>FGF16</i> | NM_003868.1    | NM_003868.1:504     | Endogenous   | 41.43 | -2.24 |
| <i>FGF17</i> | NM_003867.2    | NM_003867.2:279     | Endogenous   | 20.25 | -1.92 |
| <i>FGF18</i> | NM_003862.1    | NM_003862.1:850     | Endogenous   | 65.31 | 2.26  |
| <i>FGF19</i> | NM_005117.2    | NM_005117.2:786     | Endogenous   | 20.13 | -1.08 |
| <i>FGF2</i>  | NM_002006.4    | NM_002006.4:620     | Endogenous   | 61.74 | -2.56 |
| <i>FGF20</i> | NM_019851.1    | NM_019851.1:390     | Endogenous   | 27.42 | 1.82  |
| <i>FGF21</i> | NM_019113.2    | NM_019113.2:125     | Endogenous   | 14.44 | 1.95  |



|                |                |                     |              |        |        |
|----------------|----------------|---------------------|--------------|--------|--------|
| <i>FGF22</i>   | NM_020637.1    | NM_020637.1:206     | Endogenous   | 53.15  | 1.56   |
| <i>FGF23</i>   | NM_020638.2    | NM_020638.2:1390    | Endogenous   | 98.10  | -1.28  |
| <i>FGF3</i>    | NM_005247.2    | NM_005247.2:692     | Endogenous   | 47.17  | -1.49  |
| <i>FGF4</i>    | NM_002007.2    | NM_002007.2:688     | Endogenous   | 18.89  | 1.30   |
| <i>FGF5</i>    | NM_004464.3    | NM_004464.3:4785    | Endogenous   | 20.25  | 1.56   |
| <i>FGF6</i>    | NM_020996.1    | NM_020996.1:420     | Endogenous   | 30.11  | 2.34   |
| <i>FGF7</i>    | NM_002009.3    | NM_002009.3:190     | Endogenous   | 32.27  | 3.52   |
| <i>FGF8</i>    | NM_033163.3    | NM_033163.3:544     | Endogenous   | 68.99  | -3.84  |
| <i>FGF9</i>    | NM_002010.2    | NM_002010.2:1565    | Endogenous   | 121.14 | 4.49   |
| <i>FGFR1</i>   | NM_015850.2    | NM_015850.2:1335    | Endogenous   | 61.58  | -5.12  |
| <i>FGFR2</i>   | NM_000141.4    | NM_000141.4:647     | Endogenous   | 69.30  | 2.59   |
| <i>FGFR3</i>   | NM_022965.2    | NM_022965.2:3170    | Endogenous   | 14.81  | -1.39  |
| <i>FGFR4</i>   | NM_002011.3    | NM_002011.3:1585    | Endogenous   | 46.13  | 2.07   |
| <i>FIGF</i>    | NM_004469.2    | NM_004469.2:580     | Endogenous   | 70.82  | -5.97  |
| <i>FLNA</i>    | NM_001456.3    | NM_001456.3:7335    | Endogenous   | 32.15  | 1.64   |
| <i>FLNC</i>    | NM_001127487.1 | NM_001127487.1:7144 | Endogenous   | 57.05  | -1.28  |
| <i>FLT1</i>    | NM_002019.4    | NM_002019.4:530     | Endogenous   | 4.13   | 1.17   |
| <i>FLT3</i>    | NM_004119.1    | NM_004119.1:580     | Endogenous   | 17.60  | -1.28  |
| <i>FN1</i>     | NM_212482.1    | NM_212482.1:1776    | Endogenous   | 87.11  | -3.65  |
| <i>FOS</i>     | NM_005252.2    | NM_005252.2:1475    | Endogenous   | 19.38  | -1.46  |
| <i>FOSL1</i>   | NM_005438.2    | NM_005438.2:280     | Endogenous   | 24.52  | -1.34  |
| <i>FOXL2</i>   | NM_023067.2    | NM_023067.2:1290    | Endogenous   | 15.56  | -1.28  |
| <i>FOXO4</i>   | NM_005938.2    | NM_005938.2:35      | Endogenous   | 60.38  | -1.71  |
| <i>FST</i>     | NM_006350.2    | NM_006350.2:575     | Endogenous   | 112.06 | 2.34   |
| <i>FTSJ2</i>   | NM_013393.1    | NM_013393.1:1435    | Housekeeping | 7.71   | 1.07   |
| <i>FUBP1</i>   | NM_003902.3    | NM_003902.3:820     | Endogenous   | 15.70  | 1.02   |
| <i>FUT8</i>    | NM_004480.4    | NM_004480.4:2841    | Endogenous   | 27.56  | 1.61   |
| <i>FZD10</i>   | NM_007197.2    | NM_007197.2:1810    | Endogenous   | 35.71  | -1.71  |
| <i>FZD2</i>    | NM_001466.2    | NM_001466.2:845     | Endogenous   | 17.36  | 1.09   |
| <i>FZD3</i>    | NM_017412.2    | NM_017412.2:435     | Endogenous   | 15.20  | 1.37   |
| <i>FZD7</i>    | NM_003507.1    | NM_003507.1:1890    | Endogenous   | 13.18  | -1.59  |
| <i>FZD8</i>    | NM_031866.1    | NM_031866.1:890     | Endogenous   | 54.97  | 1.17   |
| <i>FZD9</i>    | NM_003508.2    | NM_003508.2:1320    | Endogenous   | 38.46  | -3.84  |
| <i>GADD45A</i> | NM_001924.2    | NM_001924.2:865     | Endogenous   | 14.40  | 1.28   |
| <i>GADD45B</i> | NM_015675.2    | NM_015675.2:365     | Endogenous   | 5.82   | -1.03  |
| <i>GADD45G</i> | NM_006705.3    | NM_006705.3:250     | Endogenous   | 74.05  | -12.80 |
| <i>GAS1</i>    | NM_002048.2    | NM_002048.2:1525    | Endogenous   | 74.60  | -5.12  |
| <i>GATA1</i>   | NM_002049.2    | NM_002049.2:1001    | Endogenous   | 10.12  | -1.28  |
| <i>GATA2</i>   | NM_032638.3    | NM_032638.3:1495    | Endogenous   | 54.87  | -3.80  |
| <i>GATA3</i>   | NM_001002295.1 | NM_001002295.1:2835 | Endogenous   | 12.77  | 1.37   |

|                 |                |                     |              |        |       |
|-----------------|----------------|---------------------|--------------|--------|-------|
| <i>GDF6</i>     | NM_001001557.2 | NM_001001557.2:1908 | Endogenous   | 20.51  | 2.34  |
| <i>GHR</i>      | NM_000163.2    | NM_000163.2:1835    | Endogenous   | 42.41  | -1.28 |
| <i>GLI1</i>     | NM_005269.1    | NM_005269.1:2885    | Endogenous   | 57.04  | 1.30  |
| <i>GLI3</i>     | NM_000168.5    | NM_000168.5:4769    | Endogenous   | 59.75  | -5.12 |
| <i>GNA11</i>    | NM_002067.1    | NM_002067.1:555     | Endogenous   | 23.37  | 1.44  |
| <i>GNAQ</i>     | NM_002072.2    | NM_002072.2:1100    | Endogenous   | 10.88  | 1.20  |
| <i>GNAS</i>     | NM_080425.1    | NM_080425.1:1910    | Endogenous   | 3.95   | 1.05  |
| <i>GNG12</i>    | NM_018841.3    | NM_018841.3:245     | Endogenous   | 11.62  | -1.29 |
| <i>GNG4</i>     | NM_004485.2    | NM_004485.2:215     | Endogenous   | 68.09  | -9.15 |
| <i>GNG7</i>     | NM_052847.1    | NM_052847.1:3920    | Endogenous   | 16.75  | -2.13 |
| <i>NGGT1</i>    | NM_021955.3    | NM_021955.3:260     | Endogenous   | 30.21  | -1.99 |
| <i>GPATCH3</i>  | NM_022078.2    | NM_022078.2:1685    | Housekeeping | 16.93  | 1.42  |
| <i>GPC4</i>     | NM_001448.2    | NM_001448.2:820     | Endogenous   | 116.98 | 5.58  |
| <i>GRB2</i>     | NM_002086.4    | NM_002086.4:412     | Endogenous   | 18.79  | -1.28 |
| <i>GRIA3</i>    | NM_000828.4    | NM_000828.4:426     | Endogenous   | 45.29  | -1.28 |
| <i>GRIN1</i>    | NM_000832.5    | NM_000832.5:1290    | Endogenous   | 35.83  | 1.30  |
| <i>GRIN2A</i>   | NM_000833.3    | NM_000833.3:4497    | Endogenous   | 49.60  | -1.28 |
| <i>GRIN2B</i>   | NM_000834.3    | NM_000834.3:1144    | Endogenous   | 42.13  | 1.56  |
| <i>GSK3B</i>    | NM_002093.2    | NM_002093.2:925     | Endogenous   | 21.71  | -1.26 |
| <i>GTF2H3</i>   | NM_001516.3    | NM_001516.3:70      | Endogenous   | 5.80   | 1.16  |
| <i>GZMB</i>     | NM_004131.3    | NM_004131.3:540     | Endogenous   | 53.23  | 1.95  |
| <i>H2AFX</i>    | NM_002105.2    | NM_002105.2:1392    | Endogenous   | 11.64  | -1.58 |
| <i>H3F3A</i>    | NM_002107.3    | NM_002107.3:190     | Endogenous   | 19.14  | 1.18  |
| <i>H3F3C</i>    | NM_001013699.2 | NM_001013699.2:829  | Endogenous   | 11.46  | -1.23 |
| <i>HDAC1</i>    | NM_004964.2    | NM_004964.2:785     | Endogenous   | 4.64   | 1.02  |
| <i>HDAC10</i>   | NM_032019.5    | NM_032019.5:932     | Endogenous   | 11.99  | -1.04 |
| <i>HDAC11</i>   | NM_024827.3    | NM_024827.3:2601    | Endogenous   | 22.50  | -1.56 |
| <i>HDAC2</i>    | NM_001527.1    | NM_001527.1:930     | Endogenous   | 17.57  | 1.21  |
| <i>HDAC3</i>    | NM_003883.2    | NM_003883.2:1455    | Housekeeping | 4.62   | 1.01  |
| <i>HDAC4</i>    | NM_006037.3    | NM_006037.3:6965    | Endogenous   | 5.79   | -1.25 |
| <i>HDAC5</i>    | NM_005474.4    | NM_005474.4:3160    | Endogenous   | 32.10  | -1.87 |
| <i>HDAC6</i>    | NM_006044.2    | NM_006044.2:536     | Endogenous   | 30.16  | -1.81 |
| <i>HELLS</i>    | NM_018063.3    | NM_018063.3:2040    | Endogenous   | 19.02  | -1.17 |
| <i>HES1</i>     | NM_005524.2    | NM_005524.2:860     | Endogenous   | 22.39  | 1.11  |
| <i>HES5</i>     | NM_001010926.3 | NM_001010926.3:1160 | Endogenous   | 27.68  | -2.13 |
| <i>HGF</i>      | NM_000601.4    | NM_000601.4:550     | Endogenous   | 15.78  | 1.56  |
| <i>HHEX</i>     | NM_002729.4    | NM_002729.4:1479    | Endogenous   | 9.82   | -1.08 |
| <i>HHIP</i>     | NM_022475.1    | NM_022475.1:2135    | Endogenous   | 52.19  | -1.28 |
| <i>HIST1H3B</i> | NM_003537.3    | NM_003537.3:335     | Endogenous   | 16.16  | -1.42 |
| <i>HIST1H3G</i> | NM_003534.2    | NM_003534.2:348     | Endogenous   | 22.52  | -1.58 |

|                 |                |                   |            |        |        |
|-----------------|----------------|-------------------|------------|--------|--------|
| <i>HIST1H3H</i> | NM_003536.2    | NM_003536.2:355   | Endogenous | 11.11  | -1.19  |
| <i>HMGA1</i>    | NM_145904.1    | NM_145904.1:871   | Endogenous | 11.08  | -1.02  |
| <i>HMGA2</i>    | NM_003484.1    | NM_003484.1:328   | Endogenous | 28.48  | 1.60   |
| <i>HNF1A</i>    | NM_000545.4    | NM_000545.4:2125  | Endogenous | 36.77  | 1.17   |
| <i>HOXA10</i>   | NM_018951.3    | NM_018951.3:1503  | Endogenous | 57.78  | 1.14   |
| <i>HOXA11</i>   | NM_005523.5    | NM_005523.5:1525  | Endogenous | 55.84  | -3.20  |
| <i>HOXA9</i>    | NM_152739.3    | NM_152739.3:1015  | Endogenous | 31.55  | 3.91   |
| <i>HPGD</i>     | NM_001145816.2 | NM_001145816.2:96 | Endogenous | 81.72  | 1.25   |
| <i>HRAS</i>     | NM_005343.2    | NM_005343.2:396   | Endogenous | 27.93  | 1.46   |
| <i>HSP90B1</i>  | NM_003299.1    | NM_003299.1:160   | Endogenous | 29.24  | 1.41   |
| <i>HSPA1A</i>   | NM_005345.5    | NM_005345.5:98    | Endogenous | 45.90  | 1.27   |
| <i>HSPA2</i>    | NM_021979.3    | NM_021979.3:2095  | Endogenous | 28.28  | -2.22  |
| <i>HSPA6</i>    | NM_002155.3    | NM_002155.3:2018  | Endogenous | 18.07  | 1.37   |
| <i>HSPB1</i>    | NM_001540.3    | NM_001540.3:374   | Endogenous | 1.54   | -1.04  |
| <i>IBSP</i>     | NM_004967.3    | NM_004967.3:876   | Endogenous | 12.53  | 1.56   |
| <i>ID1</i>      | NM_002165.2    | NM_002165.2:345   | Endogenous | 64.74  | 1.78   |
| <i>ID2</i>      | NM_002166.4    | NM_002166.4:505   | Endogenous | 45.12  | 1.55   |
| <i>ID4</i>      | NM_001546.2    | NM_001546.2:2048  | Endogenous | 47.53  | 2.73   |
| <i>IDH1</i>     | NM_005896.2    | NM_005896.2:105   | Endogenous | 11.32  | -1.47  |
| <i>IDH2</i>     | NM_002168.2    | NM_002168.2:944   | Endogenous | 25.69  | -1.96  |
| <i>IFNA17</i>   | NM_021268.2    | NM_021268.2:291   | Endogenous | 37.36  | -1.14  |
| <i>IFNA2</i>    | NM_000605.3    | NM_000605.3:11    | Endogenous | 21.43  | 1.17   |
| <i>IFNA7</i>    | NM_021057.2    | NM_021057.2:0     | Endogenous | 29.47  | 1.56   |
| <i>IFNG</i>     | NM_000619.2    | NM_000619.2:970   | Endogenous | 53.23  | 1.95   |
| <i>IGF1</i>     | NM_000618.3    | NM_000618.3:491   | Endogenous | 39.24  | 2.08   |
| <i>IGF1R</i>    | NM_000875.2    | NM_000875.2:455   | Endogenous | 48.77  | -2.96  |
| <i>IGFBP3</i>   | NM_000598.4    | NM_000598.4:1255  | Endogenous | 94.96  | -15.02 |
| <i>IKBKB</i>    | NM_001556.1    | NM_001556.1:1995  | Endogenous | 21.44  | -1.95  |
| <i>IKBKG</i>    | NM_003639.2    | NM_003639.2:470   | Endogenous | 10.46  | -1.01  |
| <i>IL10</i>     | NM_000572.2    | NM_000572.2:230   | Endogenous | 23.76  | 2.34   |
| <i>IL11</i>     | NM_000641.2    | NM_000641.2:1145  | Endogenous | 64.37  | -1.46  |
| <i>IL11RA</i>   | NM_147162.1    | NM_147162.1:400   | Endogenous | 62.22  | -6.40  |
| <i>IL12A</i>    | NM_000882.2    | NM_000882.2:775   | Endogenous | 23.99  | -1.75  |
| <i>IL12B</i>    | NM_002187.2    | NM_002187.2:1435  | Endogenous | 34.06  | -1.28  |
| <i>IL12RB2</i>  | NM_001559.2    | NM_001559.2:1315  | Endogenous | 44.96  | 2.34   |
| <i>IL13</i>     | NM_002188.2    | NM_002188.2:516   | Endogenous | 112.17 | 3.91   |
| <i>IL13RA2</i>  | NM_000640.2    | NM_000640.2:400   | Endogenous | 43.59  | 1.95   |
| <i>IL15</i>     | NM_172174.1    | NM_172174.1:1685  | Endogenous | 47.83  | -1.28  |
| <i>IL19</i>     | NM_013371.3    | NM_013371.3:1030  | Endogenous | 73.58  | 1.95   |
| <i>IL1A</i>     | NM_000575.3    | NM_000575.3:1085  | Endogenous | 83.45  | -3.58  |

|                |                |                     |            |        |       |
|----------------|----------------|---------------------|------------|--------|-------|
| <i>IL1B</i>    | NM_000576.2    | NM_000576.2:840     | Endogenous | 49.27  | -4.48 |
| <i>IL1R1</i>   | NM_000877.2    | NM_000877.2:4295    | Endogenous | 48.98  | -2.43 |
| <i>IL1R2</i>   | NM_173343.1    | NM_173343.1:113     | Endogenous | 50.58  | -1.83 |
| <i>IL1RAP</i>  | NM_002182.2    | NM_002182.2:460     | Endogenous | 18.68  | 1.45  |
| <i>IL20RA</i>  | NM_014432.2    | NM_014432.2:535     | Endogenous | 102.53 | 3.36  |
| <i>IL20RB</i>  | NM_144717.2    | NM_144717.2:1575    | Endogenous | 27.79  | -2.06 |
| <i>IL22RA1</i> | NM_021258.2    | NM_021258.2:2524    | Endogenous | 66.51  | 2.83  |
| <i>IL22RA2</i> | NM_181309.1    | NM_181309.1:290     | Endogenous | 38.01  | 3.13  |
| <i>IL23A</i>   | NM_016584.2    | NM_016584.2:411     | Endogenous | 50.15  | -2.05 |
| <i>IL23R</i>   | NM_144701.2    | NM_144701.2:710     | Endogenous | 38.35  | -1.28 |
| <i>IL24</i>    | NM_181339.1    | NM_181339.1:1016    | Endogenous | 28.56  | -1.54 |
| <i>IL2RA</i>   | NM_000417.1    | NM_000417.1:1000    | Endogenous | 55.29  | -2.56 |
| <i>IL2RB</i>   | NM_000878.2    | NM_000878.2:1980    | Endogenous | 55.45  | -4.27 |
| <i>IL3</i>     | NM_000588.3    | NM_000588.3:130     | Endogenous | 27.27  | 1.07  |
| <i>IL3RA</i>   | NM_002183.2    | NM_002183.2:745     | Endogenous | 73.76  | -3.84 |
| <i>IL5RA</i>   | NM_000564.3    | NM_000564.3:210     | Endogenous | 18.27  | 1.30  |
| <i>IL6</i>     | NM_000600.1    | NM_000600.1:220     | Endogenous | 47.54  | 1.56  |
| <i>IL6R</i>    | NM_000565.2    | NM_000565.2:993     | Endogenous | 18.56  | -1.20 |
| <i>IL7</i>     | NM_000880.2    | NM_000880.2:38      | Endogenous | 16.56  | -1.28 |
| <i>IL7R</i>    | NM_002185.2    | NM_002185.2:1610    | Endogenous | 41.43  | -1.28 |
| <i>IL8</i>     | NM_000584.2    | NM_000584.2:25      | Endogenous | 61.63  | -2.90 |
| <i>INHBA</i>   | NM_002192.2    | NM_002192.2:490     | Endogenous | 33.39  | 1.17  |
| <i>INHBB</i>   | NM_002193.2    | NM_002193.2:1969    | Endogenous | 2.78   | -1.54 |
| <i>IRAK2</i>   | NM_001570.3    | NM_001570.3:1285    | Endogenous | 44.16  | -1.96 |
| <i>IRAK3</i>   | NM_007199.1    | NM_007199.1:1735    | Endogenous | 4.13   | -1.28 |
| <i>IRS1</i>    | NM_005544.2    | NM_005544.2:6224    | Endogenous | 75.37  | 3.21  |
| <i>ITGA2</i>   | NM_002203.2    | NM_002203.2:475     | Endogenous | 32.29  | 1.08  |
| <i>ITGA3</i>   | NM_005501.2    | NM_005501.2:1138    | Endogenous | 9.73   | -1.42 |
| <i>ITGA6</i>   | NM_000210.1    | NM_000210.1:3065    | Endogenous | 17.15  | -1.27 |
| <i>ITGA7</i>   | NM_002206.1    | NM_002206.1:1170    | Endogenous | 38.01  | 2.08  |
| <i>ITGA8</i>   | NM_003638.1    | NM_003638.1:1215    | Endogenous | 48.55  | 1.17  |
| <i>ITGA9</i>   | NM_002207.2    | NM_002207.2:2380    | Endogenous | 43.16  | 1.56  |
| <i>ITGB3</i>   | NM_000212.2    | NM_000212.2:4485    | Endogenous | 42.13  | 1.17  |
| <i>ITGB4</i>   | NM_001005731.1 | NM_001005731.1:4151 | Endogenous | 46.44  | -3.19 |
| <i>ITGB6</i>   | NM_001282353.1 | NM_001282353.1:4124 | Endogenous | 119.82 | 5.02  |
| <i>ITGB7</i>   | NM_000889.1    | NM_000889.1:1278    | Endogenous | 21.43  | -2.99 |
| <i>ITGB8</i>   | NM_002214.2    | NM_002214.2:2609    | Endogenous | 39.33  | -1.59 |
| <i>JAG1</i>    | NM_000214.2    | NM_000214.2:915     | Endogenous | 118.74 | 4.50  |
| <i>JAG2</i>    | NM_145159.1    | NM_145159.1:4225    | Endogenous | 51.73  | -2.94 |
| <i>JAK1</i>    | NM_002227.1    | NM_002227.1:285     | Endogenous | 39.98  | -1.88 |

|                |                |                     |            |        |       |
|----------------|----------------|---------------------|------------|--------|-------|
| <i>JAK2</i>    | NM_004972.2    | NM_004972.2:455     | Endogenous | 38.80  | 1.76  |
| <i>JAK3</i>    | NM_000215.2    | NM_000215.2:1715    | Endogenous | 47.97  | -3.41 |
| <i>JUN</i>     | NM_002228.3    | NM_002228.3:140     | Endogenous | 88.98  | 3.13  |
| <i>KAT2B</i>   | NM_003884.3    | NM_003884.3:1220    | Endogenous | 6.18   | 1.08  |
| <i>KDM5C</i>   | NM_004187.2    | NM_004187.2:1170    | Endogenous | 18.32  | 1.48  |
| <i>KDM6A</i>   | NM_021140.2    | NM_021140.2:2590    | Endogenous | 57.03  | 2.64  |
| <i>KIT</i>     | NM_000222.1    | NM_000222.1:5       | Endogenous | 26.47  | -3.20 |
| <i>KITLG</i>   | NM_003994.4    | NM_003994.4:1155    | Endogenous | 113.71 | 7.49  |
| <i>KLF4</i>    | NM_004235.4    | NM_004235.4:1980    | Endogenous | 47.59  | -1.81 |
| <i>KMT2C</i>   | NM_170606.2    | NM_170606.2:12505   | Endogenous | 9.27   | -1.05 |
| <i>KMT2D</i>   | NM_003482.3    | NM_003482.3:6070    | Endogenous | 36.84  | 1.64  |
| <i>KRAS</i>    | NM_004985.3    | NM_004985.3:1790    | Endogenous | 8.21   | 1.60  |
| <i>LAMA1</i>   | NM_005559.2    | NM_005559.2:5230    | Endogenous | 58.94  | -4.08 |
| <i>LAMA3</i>   | NM_000227.3    | NM_000227.3:4260    | Endogenous | 145.21 | 9.92  |
| <i>LAMA5</i>   | NM_005560.3    | NM_005560.3:787     | Endogenous | 48.88  | 2.00  |
| <i>LAMB3</i>   | NM_000228.2    | NM_000228.2:695     | Endogenous | 46.36  | 1.96  |
| <i>LAMB4</i>   | NM_007356.2    | NM_007356.2:2852    | Endogenous | 39.31  | -1.92 |
| <i>LAMC2</i>   | NM_005562.2    | NM_005562.2:2819    | Endogenous | 76.32  | -1.97 |
| <i>LAMC3</i>   | NM_006059.3    | NM_006059.3:2090    | Endogenous | 28.42  | -1.02 |
| <i>LAT</i>     | NM_001014987.1 | NM_001014987.1:1290 | Endogenous | 73.67  | 2.19  |
| <i>LEF1</i>    | NM_016269.3    | NM_016269.3:1165    | Endogenous | 60.63  | -4.94 |
| <i>LEFTY1</i>  | NM_020997.2    | NM_020997.2:1405    | Endogenous | 35.94  | -2.30 |
| <i>LEFTY2</i>  | NM_003240.2    | NM_003240.2:1283    | Endogenous | 17.28  | 1.00  |
| <i>LEP</i>     | NM_000230.2    | NM_000230.2:1875    | Endogenous | 49.52  | -1.28 |
| <i>LEPR</i>    | NM_001003679.1 | NM_001003679.1:2000 | Endogenous | 14.79  | -1.50 |
| <i>LFNG</i>    | NM_001040168.1 | NM_001040168.1:717  | Endogenous | 46.24  | 1.90  |
| <i>LIF</i>     | NM_002309.3    | NM_002309.3:1240    | Endogenous | 23.76  | 1.48  |
| <i>LIFR</i>    | NM_002310.3    | NM_002310.3:2995    | Endogenous | 146.58 | 23.01 |
| <i>LIG4</i>    | NM_002312.3    | NM_002312.3:2623    | Endogenous | 10.42  | 1.39  |
| <i>LRP2</i>    | NM_004525.2    | NM_004525.2:12505   | Endogenous | 13.63  | -1.28 |
| <i>LTBP1</i>   | NM_000627.3    | NM_000627.3:4124    | Endogenous | 40.27  | -2.83 |
| <i>MAD2L2</i>  | NM_001127325.1 | NM_001127325.1:290  | Endogenous | 12.67  | -1.27 |
| <i>MAML2</i>   | NM_032427.1    | NM_032427.1:4125    | Endogenous | 43.73  | -2.69 |
| <i>MAP2K1</i>  | NM_002755.2    | NM_002755.2:970     | Endogenous | 26.68  | -1.77 |
| <i>MAP2K2</i>  | NM_030662.2    | NM_030662.2:1325    | Endogenous | 16.08  | 1.15  |
| <i>MAP2K4</i>  | NM_003010.2    | NM_003010.2:2830    | Endogenous | 6.30   | 1.15  |
| <i>MAP2K6</i>  | NM_002758.3    | NM_002758.3:555     | Endogenous | 30.26  | -2.26 |
| <i>MAP3K1</i>  | NM_005921.1    | NM_005921.1:2525    | Endogenous | 38.06  | 2.20  |
| <i>MAP3K12</i> | NM_006301.2    | NM_006301.2:800     | Endogenous | 37.08  | -2.30 |
| <i>MAP3K13</i> | NM_004721.3    | NM_004721.3:965     | Endogenous | 5.93   | -1.14 |

|          |                |                    |              |        |       |
|----------|----------------|--------------------|--------------|--------|-------|
| MAP3K14  | NM_003954.1    | NM_003954.1:620    | Endogenous   | 14.65  | 1.33  |
| MAP3K5   | NM_005923.3    | NM_005923.3:2415   | Endogenous   | 15.04  | -1.12 |
| MAP3K8   | NM_005204.2    | NM_005204.2:2050   | Endogenous   | 27.03  | -1.81 |
| MAPK1    | NM_138957.2    | NM_138957.2:430    | Endogenous   | 11.07  | -1.36 |
| MAPK10   | NM_002753.2    | NM_002753.2:2080   | Endogenous   | 20.19  | 1.14  |
| MAPK12   | NM_002969.3    | NM_002969.3:425    | Endogenous   | 70.67  | -8.06 |
| MAPK3    | NM_001040056.1 | NM_001040056.1:580 | Endogenous   | 33.61  | -1.82 |
| MAPK8    | NM_002750.2    | NM_002750.2:945    | Endogenous   | 5.80   | 1.48  |
| MAPK8IP1 | NM_005456.2    | NM_005456.2:259    | Endogenous   | 24.19  | -2.13 |
| MAPK8IP2 | NM_012324.2    | NM_012324.2:1885   | Endogenous   | 71.77  | -4.98 |
| MAPK9    | NM_139068.2    | NM_139068.2:365    | Endogenous   | 4.62   | -1.07 |
| MAPT     | NM_016834.3    | NM_016834.3:1205   | Endogenous   | 60.13  | -2.56 |
| MCM2     | NM_004526.2    | NM_004526.2:2945   | Endogenous   | 15.56  | -1.57 |
| MCM4     | NM_182746.1    | NM_182746.1:1200   | Endogenous   | 15.00  | -1.64 |
| MCM5     | NM_006739.3    | NM_006739.3:1580   | Endogenous   | 11.86  | -1.57 |
| MCM7     | NM_182776.1    | NM_182776.1:1325   | Endogenous   | 10.10  | -1.11 |
| MDC1     | NM_014641.2    | NM_014641.2:6719   | Endogenous   | 11.93  | -1.19 |
| MDM2     | NM_006878.2    | NM_006878.2:280    | Endogenous   | 20.60  | 1.50  |
| MECOM    | NM_005241.2    | NM_005241.2:3355   | Endogenous   | 102.62 | 5.27  |
| MED12    | NM_005120.2    | NM_005120.2:375    | Endogenous   | 8.21   | 1.04  |
| MEN1     | NM_130802.2    | NM_130802.2:2480   | Endogenous   | 18.82  | -1.38 |
| MET      | NM_000245.2    | NM_000245.2:405    | Endogenous   | 16.17  | -1.39 |
| MFNG     | NM_002405.2    | NM_002405.2:1681   | Endogenous   | 16.46  | 1.04  |
| MGMT     | NM_002412.3    | NM_002412.3:323    | Endogenous   | 35.37  | 1.57  |
| MLF1     | NM_022443.3    | NM_022443.3:720    | Endogenous   | 46.94  | -1.28 |
| MLH1     | NM_000249.2    | NM_000249.2:1605   | Endogenous   | 23.43  | 1.29  |
| MLLT3    | NM_004529.2    | NM_004529.2:1480   | Endogenous   | 81.32  | 5.14  |
| MLLT4    | NM_005936.2    | NM_005936.2:1560   | Endogenous   | 38.37  | -2.15 |
| MMP3     | NM_002422.3    | NM_002422.3:25     | Endogenous   | 60.13  | -1.28 |
| MMP7     | NM_002423.3    | NM_002423.3:311    | Endogenous   | 48.03  | 1.12  |
| MMP9     | NM_004994.2    | NM_004994.2:1530   | Endogenous   | 49.58  | 1.88  |
| MNAT1    | NM_002431.2    | NM_002431.2:975    | Endogenous   | 26.15  | -1.47 |
| MPL      | NM_005373.2    | NM_005373.2:895    | Endogenous   | 38.18  | 3.91  |
| MPO      | NM_000250.1    | NM_000250.1:545    | Endogenous   | 12.46  | 1.12  |
| MRPS5    | NM_031902.3    | NM_031902.3:390    | Housekeeping | 21.80  | -1.35 |
| MSH2     | NM_000251.1    | NM_000251.1:2105   | Endogenous   | 8.98   | -1.04 |
| MSH6     | NM_000179.1    | NM_000179.1:3525   | Endogenous   | 11.90  | -1.66 |
| MTMR14   | NM_022485.3    | NM_022485.3:720    | Housekeeping | 8.90   | 1.02  |
| MTOR     | NM_004958.2    | NM_004958.2:5095   | Endogenous   | 7.05   | 1.02  |
| MUTYH    | NM_012222.2    | NM_012222.2:412    | Endogenous   | 44.41  | -1.12 |

|        |                |                     |              |        |        |
|--------|----------------|---------------------|--------------|--------|--------|
| MYB    | NM_005375.2    | NM_005375.2:3145    | Endogenous   | 30.60  | 1.03   |
| MYC    | NM_002467.3    | NM_002467.3:1610    | Endogenous   | 21.74  | 1.22   |
| MYCN   | NM_005378.4    | NM_005378.4:1545    | Endogenous   | 46.91  | -2.53  |
| MYD88  | NM_002468.3    | NM_002468.3:2145    | Endogenous   | 44.00  | 1.71   |
| NASP   | NM_172164.1    | NM_172164.1:2970    | Endogenous   | 15.05  | -1.15  |
| NBN    | NM_001024688.1 | NM_001024688.1:1105 | Endogenous   | 17.01  | -1.47  |
| NCOR1  | NM_006311.3    | NM_006311.3:1390    | Endogenous   | 4.21   | -1.09  |
| NF1    | NM_000267.2    | NM_000267.2:1035    | Endogenous   | 21.58  | -1.44  |
| NF2    | NM_181828.2    | NM_181828.2:455     | Endogenous   | 6.04   | 1.08   |
| NFATC1 | NM_172389.1    | NM_172389.1:1984    | Endogenous   | 74.26  | -3.84  |
| NFE2L2 | NM_006164.3    | NM_006164.3:995     | Endogenous   | 3.86   | -1.07  |
| NFKB1  | NM_003998.2    | NM_003998.2:1675    | Endogenous   | 28.69  | 1.33   |
| NFKBIA | NM_020529.1    | NM_020529.1:945     | Endogenous   | 43.15  | -1.28  |
| NFKBIZ | NM_001005474.1 | NM_001005474.1:2030 | Endogenous   | 59.73  | 1.92   |
| NGF    | NM_002506.2    | NM_002506.2:100     | Endogenous   | 40.28  | -1.02  |
| NGFR   | NM_002507.1    | NM_002507.1:2705    | Endogenous   | 66.59  | -12.48 |
| NKD1   | NM_033119.3    | NM_033119.3:2325    | Endogenous   | 53.66  | 1.79   |
| NODAL  | NM_018055.3    | NM_018055.3:320     | Endogenous   | 125.93 | 2.86   |
| NOG    | NM_005450.4    | NM_005450.4:1543    | Endogenous   | 41.00  | -2.21  |
| NOL7   | NM_016167.3    | NM_016167.3:335     | Housekeeping | 3.97   | 1.12   |
| NOS3   | NM_000603.4    | NM_000603.4:1456    | Endogenous   | 49.19  | 1.22   |
| NOTCH1 | NM_017617.3    | NM_017617.3:735     | Endogenous   | 12.84  | 1.25   |
| NOTCH2 | NM_024408.3    | NM_024408.3:2842    | Endogenous   | 12.79  | 1.46   |
| NOTCH3 | NM_000435.2    | NM_000435.2:1965    | Endogenous   | 32.27  | -2.17  |
| NPM1   | NM_002520.5    | NM_002520.5:10      | Endogenous   | 20.06  | -1.53  |
| NPM2   | NM_182795.1    | NM_182795.1:745     | Endogenous   | 72.34  | -1.28  |
| NR4A1  | NM_173157.1    | NM_173157.1:1575    | Endogenous   | 31.69  | -1.42  |
| NR4A3  | NM_173198.1    | NM_173198.1:2590    | Endogenous   | 34.78  | 1.56   |
| NRAS   | NM_002524.3    | NM_002524.3:877     | Endogenous   | 23.22  | -1.57  |
| NSD1   | NM_022455.4    | NM_022455.4:10655   | Endogenous   | 14.59  | 1.43   |
| NTF3   | NM_002527.4    | NM_002527.4:151     | Endogenous   | 55.29  | -1.28  |
| NTHL1  | NM_002528.5    | NM_002528.5:476     | Endogenous   | 4.70   | 1.03   |
| NTRK1  | NM_001012331.1 | NM_001012331.1:1365 | Endogenous   | 27.68  | 2.34   |
| NTRK2  | NM_001007097.1 | NM_001007097.1:1605 | Endogenous   | 32.58  | 1.56   |
| NUBP1  | NM_001278506.1 | NM_001278506.1:304  | Housekeeping | 26.00  | -2.00  |
| NUMBL  | NM_004756.3    | NM_004756.3:591     | Endogenous   | 17.05  | 1.31   |
| NUPR1  | NM_001042483.1 | NM_001042483.1:829  | Endogenous   | 77.65  | -7.28  |
| OSM    | NM_020530.3    | NM_020530.3:1662    | Endogenous   | 46.95  | 1.25   |
| PAK3   | NM_002578.2    | NM_002578.2:1830    | Endogenous   | 77.09  | 4.69   |
| PAK7   | NM_177990.1    | NM_177990.1:615     | Endogenous   | 35.32  | 1.56   |

|                |                |                     |              |        |       |
|----------------|----------------|---------------------|--------------|--------|-------|
| <i>PAX3</i>    | NM_013942.3    | NM_013942.3:705     | Endogenous   | 89.21  | -1.28 |
| <i>PAX5</i>    | NM_016734.1    | NM_016734.1:2288    | Endogenous   | 40.63  | 1.30  |
| <i>PAX8</i>    | NM_013953.3    | NM_013953.3:3465    | Endogenous   | 65.85  | -2.56 |
| <i>PBRM1</i>   | NM_181042.3    | NM_181042.3:6100    | Endogenous   | 46.04  | 2.27  |
| <i>PBX1</i>    | NM_002585.2    | NM_002585.2:368     | Endogenous   | 9.57   | -1.25 |
| <i>PBX3</i>    | NM_006195.5    | NM_006195.5:2050    | Endogenous   | 28.89  | -2.37 |
| <i>PCK1</i>    | NM_002591.2    | NM_002591.2:1870    | Endogenous   | 25.94  | -1.28 |
| <i>PCNA</i>    | NM_002592.2    | NM_002592.2:280     | Endogenous   | 21.27  | 1.02  |
| <i>PDGFA</i>   | NM_002607.5    | NM_002607.5:2460    | Endogenous   | 16.05  | -1.08 |
| <i>PDGFB</i>   | NM_033016.2    | NM_033016.2:1480    | Endogenous   | 18.02  | 1.22  |
| <i>PDGFC</i>   | NM_016205.1    | NM_016205.1:10      | Endogenous   | 66.54  | -5.44 |
| <i>PDGFD</i>   | NM_025208.4    | NM_025208.4:1120    | Endogenous   | 30.83  | 3.91  |
| <i>PDGFRA</i>  | NM_006206.3    | NM_006206.3:1925    | Endogenous   | 151.49 | 14.84 |
| <i>PDGFRB</i>  | NM_002609.3    | NM_002609.3:840     | Endogenous   | 36.47  | -1.28 |
| <i>PGF</i>     | NM_002632.5    | NM_002632.5:1047    | Endogenous   | 20.91  | -1.02 |
| <i>PHF6</i>    | NM_032335.3    | NM_032335.3:85      | Endogenous   | 9.86   | -1.21 |
| <i>PIAS1</i>   | NM_016166.1    | NM_016166.1:1870    | Housekeeping | 6.97   | -1.11 |
| <i>PIK3CA</i>  | NM_006218.2    | NM_006218.2:2445    | Endogenous   | 42.94  | -2.17 |
| <i>PIK3CB</i>  | NM_006219.1    | NM_006219.1:2945    | Endogenous   | 18.90  | -1.39 |
| <i>PIK3CD</i>  | NM_005026.3    | NM_005026.3:95      | Endogenous   | 39.31  | -1.76 |
| <i>PIK3CG</i>  | NM_002649.2    | NM_002649.2:2125    | Endogenous   | 29.62  | -1.28 |
| <i>PIK3R1</i>  | NM_181504.2    | NM_181504.2:1105    | Endogenous   | 110.52 | 4.67  |
| <i>PIK3R2</i>  | NM_005027.2    | NM_005027.2:3100    | Endogenous   | 26.15  | -1.26 |
| <i>PIK3R3</i>  | NM_003629.3    | NM_003629.3:1800    | Endogenous   | 15.63  | -1.11 |
| <i>PIK3R4</i>  | NM_014602.1    | NM_014602.1:3620    | Housekeeping | 9.54   | -1.14 |
| <i>PIK3R5</i>  | NM_001142633.1 | NM_001142633.1:3335 | Endogenous   | 54.15  | -4.16 |
| <i>PIM1</i>    | NM_002648.2    | NM_002648.2:1630    | Endogenous   | 34.70  | -1.76 |
| <i>PITX2</i>   | NM_000325.5    | NM_000325.5:1381    | Endogenous   | 57.14  | 1.56  |
| <i>PKMYT1</i>  | NM_004203.3    | NM_004203.3:780     | Endogenous   | 1.39   | 1.12  |
| <i>PLA1A</i>   | NM_015900.2    | NM_015900.2:1250    | Endogenous   | 55.84  | -1.92 |
| <i>PLA2G10</i> | NM_003561.1    | NM_003561.1:779     | Endogenous   | 16.84  | 3.13  |
| <i>PLA2G2A</i> | NM_000300.2    | NM_000300.2:715     | Endogenous   | 95.45  | 3.15  |
| <i>PLA2G3</i>  | NM_015715.3    | NM_015715.3:2415    | Endogenous   | 10.89  | -1.14 |
| <i>PLA2G4A</i> | NM_024420.2    | NM_024420.2:1763    | Endogenous   | 16.68  | -1.54 |
| <i>PLA2G4C</i> | NM_003706.2    | NM_003706.2:2310    | Endogenous   | 87.50  | 3.13  |
| <i>PLA2G4E</i> | NM_001206670.1 | NM_001206670.1:4174 | Endogenous   | 9.59   | 3.13  |
| <i>PLA2G4F</i> | NM_213600.2    | NM_213600.2:3140    | Endogenous   | 85.21  | -5.76 |
| <i>PLA2G5</i>  | NM_000929.2    | NM_000929.2:1375    | Endogenous   | 45.92  | -2.56 |
| <i>PLAT</i>    | NM_000931.2    | NM_000931.2:1334    | Endogenous   | 46.23  | -3.47 |
| <i>PLAU</i>    | NM_002658.2    | NM_002658.2:793     | Endogenous   | 47.62  | -2.13 |



|                 |                |                     |            |        |       |
|-----------------|----------------|---------------------|------------|--------|-------|
| <i>PLCB1</i>    | NM_182734.1    | NM_182734.1:170     | Endogenous | 21.04  | -1.69 |
| <i>PLCB4</i>    | NM_000933.3    | NM_000933.3:215     | Endogenous | 119.41 | 5.05  |
| <i>PLCE1</i>    | NM_001165979.1 | NM_001165979.1:392  | Endogenous | 135.91 | 6.41  |
| <i>PLCG2</i>    | NM_002661.2    | NM_002661.2:525     | Endogenous | 49.96  | -2.45 |
| <i>PLD1</i>     | NM_002662.3    | NM_002662.3:1265    | Endogenous | 59.40  | -7.25 |
| <i>PML</i>      | NM_002675.3    | NM_002675.3:281     | Endogenous | 15.16  | -1.02 |
| <i>POLB</i>     | NM_002690.1    | NM_002690.1:145     | Endogenous | 31.33  | -1.90 |
| <i>POLD1</i>    | NM_002691.2    | NM_002691.2:2392    | Endogenous | 20.75  | 1.29  |
| <i>POLD4</i>    | NM_021173.2    | NM_021173.2:470     | Endogenous | 10.67  | 1.05  |
| <i>POLE2</i>    | NM_002692.2    | NM_002692.2:1420    | Endogenous | 11.94  | -1.04 |
| <i>POLR2D</i>   | NM_004805.3    | NM_004805.3:1476    | Endogenous | 4.46   | -1.06 |
| <i>POLR2H</i>   | NM_001278698.1 | NM_001278698.1:940  | Endogenous | 18.36  | -1.42 |
| <i>POLR2J</i>   | NM_006234.4    | NM_006234.4:618     | Endogenous | 28.75  | 1.51  |
| <i>PPARG</i>    | NM_015869.3    | NM_015869.3:1035    | Endogenous | 20.62  | -1.74 |
| <i>PPARGC1A</i> | NM_013261.3    | NM_013261.3:1505    | Endogenous | 70.74  | 1.49  |
| <i>PPP2CB</i>   | NM_001009552.1 | NM_001009552.1:1075 | Endogenous | 4.79   | 1.76  |
| <i>PPP2R1A</i>  | NM_014225.3    | NM_014225.3:1440    | Endogenous | 19.12  | 1.25  |
| <i>PPP2R2B</i>  | NM_181676.2    | NM_181676.2:690     | Endogenous | 35.32  | 1.56  |
| <i>PPP2R2C</i>  | NM_181876.2    | NM_181876.2:2215    | Endogenous | 6.72   | -1.60 |
| <i>PPP3CA</i>   | NM_000944.4    | NM_000944.4:3920    | Endogenous | 25.21  | -1.70 |
| <i>PPP3CB</i>   | NM_001142354.1 | NM_001142354.1:1690 | Endogenous | 25.13  | -1.05 |
| <i>PPP3CC</i>   | NM_005605.3    | NM_005605.3:1460    | Endogenous | 13.83  | 1.10  |
| <i>PPP3R1</i>   | NM_000945.3    | NM_000945.3:2385    | Endogenous | 9.74   | -1.10 |
| <i>PPP3R2</i>   | NM_147180.2    | NM_147180.2:1165    | Endogenous | 52.57  | -3.84 |
| <i>PRDM1</i>    | NM_182907.1    | NM_182907.1:310     | Endogenous | 28.14  | -1.03 |
| <i>PRKAA2</i>   | NM_006252.2    | NM_006252.2:975     | Endogenous | 9.30   | 3.91  |
| <i>PRKACA</i>   | NM_002730.3    | NM_002730.3:400     | Endogenous | 11.92  | -1.24 |
| <i>PRKACB</i>   | NM_182948.2    | NM_182948.2:805     | Endogenous | 117.09 | 3.52  |
| <i>PRKACG</i>   | NM_002732.2    | NM_002732.2:775     | Endogenous | 53.15  | 3.13  |
| <i>PRKAR1B</i>  | NM_001164759.1 | NM_001164759.1:1112 | Endogenous | 20.95  | 1.31  |
| <i>PRKAR2A</i>  | NM_004157.2    | NM_004157.2:1590    | Endogenous | 142.53 | 13.33 |
| <i>PRKAR2B</i>  | NM_002736.2    | NM_002736.2:1350    | Endogenous | 19.83  | -1.71 |
| <i>PRKCA</i>    | NM_002737.2    | NM_002737.2:5560    | Endogenous | 28.68  | 2.41  |
| <i>PRKCB</i>    | NM_212535.1    | NM_212535.1:1750    | Endogenous | 58.00  | 1.56  |
| <i>PRKCG</i>    | NM_002739.3    | NM_002739.3:445     | Endogenous | 12.07  | 1.95  |
| <i>PRKDC</i>    | NM_006904.6    | NM_006904.6:12750   | Endogenous | 16.99  | -1.40 |
| <i>PRKX</i>     | NM_005044.1    | NM_005044.1:2590    | Endogenous | 40.38  | 1.30  |
| <i>PRL</i>      | NM_000948.3    | NM_000948.3:835     | Endogenous | 30.83  | 1.95  |
| <i>PRLR</i>     | NM_001204318.1 | NM_001204318.1:563  | Endogenous | 52.42  | 1.12  |
| <i>PRMT8</i>    | NM_019854.3    | NM_019854.3:1900    | Endogenous | 44.96  | 2.34  |

|                |                |                     |              |        |       |
|----------------|----------------|---------------------|--------------|--------|-------|
| <i>PROM1</i>   | NM_006017.1    | NM_006017.1:925     | Endogenous   | 63.88  | -1.28 |
| <i>PRPF38A</i> | NM_032864.3    | NM_032864.3:335     | Housekeeping | 3.12   | -1.01 |
| <i>PTCH1</i>   | NM_000264.3    | NM_000264.3:5420    | Endogenous   | 5.09   | -1.11 |
| <i>PTCRA</i>   | NM_138296.2    | NM_138296.2:507     | Endogenous   | 23.28  | -2.90 |
| <i>PTEN</i>    | NM_000314.3    | NM_000314.3:1675    | Endogenous   | 7.48   | 1.04  |
| <i>PTPN11</i>  | NM_002834.3    | NM_002834.3:1480    | Endogenous   | 5.40   | -1.11 |
| <i>PTPN5</i>   | NM_001039970.1 | NM_001039970.1:2354 | Endogenous   | 69.87  | 3.91  |
| <i>PTPRR</i>   | NM_001207015.1 | NM_001207015.1:1652 | Endogenous   | 49.43  | 6.25  |
| <i>PTTG2</i>   | NM_006607.2    | NM_006607.2:5       | Endogenous   | 30.35  | -2.20 |
| <i>RAC1</i>    | NM_198829.1    | NM_198829.1:1250    | Endogenous   | 25.50  | -1.68 |
| <i>RAC2</i>    | NM_002872.3    | NM_002872.3:1069    | Endogenous   | 42.89  | -2.42 |
| <i>RAC3</i>    | NM_005052.2    | NM_005052.2:702     | Endogenous   | 34.95  | 1.48  |
| <i>RAD21</i>   | NM_006265.2    | NM_006265.2:1080    | Endogenous   | 34.55  | -2.02 |
| <i>RAD50</i>   | NM_005732.2    | NM_005732.2:5397    | Endogenous   | 13.96  | 1.10  |
| <i>RAD51</i>   | NM_133487.2    | NM_133487.2:566     | Endogenous   | 25.74  | -1.80 |
| <i>RAD52</i>   | NM_134424.2    | NM_134424.2:297     | Endogenous   | 64.86  | 2.70  |
| <i>RAF1</i>    | NM_002880.2    | NM_002880.2:1990    | Endogenous   | 5.05   | -1.13 |
| <i>RASA4</i>   | NM_001079877.2 | NM_001079877.2:5330 | Endogenous   | 60.41  | -3.75 |
| <i>RASAL1</i>  | NM_004658.1    | NM_004658.1:2900    | Endogenous   | 81.96  | 6.88  |
| <i>RASGRF1</i> | NM_153815.2    | NM_153815.2:2443    | Endogenous   | 82.79  | -4.08 |
| <i>RASGRF2</i> | NM_006909.1    | NM_006909.1:2675    | Endogenous   | 16.56  | -3.84 |
| <i>RASGRP1</i> | NM_005739.3    | NM_005739.3:365     | Endogenous   | 100.48 | 6.25  |
| <i>RASGRP2</i> | NM_001098670.1 | NM_001098670.1:1978 | Endogenous   | 15.84  | -2.19 |
| <i>RB1</i>     | NM_000321.1    | NM_000321.1:2110    | Endogenous   | 12.35  | 1.11  |
| <i>RBM45</i>   | NM_152945.2    | NM_152945.2:1080    | Housekeeping | 21.12  | 2.14  |
| <i>RBX1</i>    | NM_014248.2    | NM_014248.2:162     | Endogenous   | 17.08  | -1.55 |
| <i>RELA</i>    | NM_021975.3    | NM_021975.3:1990    | Endogenous   | 30.50  | -1.37 |
| <i>RELN</i>    | NM_005045.2    | NM_005045.2:345     | Endogenous   | 49.52  | -1.28 |
| <i>RET</i>     | NM_020630.4    | NM_020630.4:2911    | Endogenous   | 32.98  | 1.04  |
| <i>RFC3</i>    | NM_002915.3    | NM_002915.3:740     | Endogenous   | 36.22  | 1.41  |
| <i>RFC4</i>    | NM_181573.2    | NM_181573.2:1035    | Endogenous   | 36.39  | -2.15 |
| <i>RHOA</i>    | NM_001664.2    | NM_001664.2:1230    | Endogenous   | 36.75  | 1.55  |
| <i>RIN1</i>    | NM_004292.2    | NM_004292.2:2572    | Endogenous   | 40.17  | -2.96 |
| <i>RNF43</i>   | NM_017763.4    | NM_017763.4:725     | Endogenous   | 26.49  | 1.32  |
| <i>RPA3</i>    | NM_002947.3    | NM_002947.3:990     | Endogenous   | 15.56  | -1.28 |
| <i>RPS27A</i>  | NM_002954.5    | NM_002954.5:650     | Endogenous   | 5.74   | -1.09 |
| <i>RPS6KA5</i> | NM_004755.2    | NM_004755.2:855     | Endogenous   | 42.65  | -1.92 |
| <i>RPS6KA6</i> | NM_014496.1    | NM_014496.1:2250    | Endogenous   | 51.60  | -1.60 |
| <i>RRAS2</i>   | NM_001102669.2 | NM_001102669.2:1785 | Endogenous   | 80.25  | 3.43  |
| <i>RUNX1</i>   | NM_001754.4    | NM_001754.4:635     | Endogenous   | 33.46  | 2.51  |

|                 |                |                     |              |        |       |
|-----------------|----------------|---------------------|--------------|--------|-------|
| <i>RUNX1T1</i>  | NM_004349.2    | NM_004349.2:1085    | Endogenous   | 37.89  | 1.56  |
| <i>RXRG</i>     | NM_006917.3    | NM_006917.3:1105    | Endogenous   | 71.28  | -1.28 |
| <i>SAP130</i>   | NM_024545.3    | NM_024545.3:3090    | Housekeeping | 12.66  | -1.08 |
| <i>SETBP1</i>   | NM_015559.2    | NM_015559.2:704     | Endogenous   | 49.52  | -1.28 |
| <i>SETD2</i>    | NM_014159.6    | NM_014159.6:6160    | Endogenous   | 44.88  | 2.02  |
| <i>SF3A3</i>    | NM_006802.2    | NM_006802.2:2060    | Housekeeping | 7.66   | -1.14 |
| <i>SF3B1</i>    | NM_001005526.1 | NM_001005526.1:0    | Endogenous   | 10.22  | -1.15 |
| <i>SFN</i>      | NM_006142.3    | NM_006142.3:579     | Endogenous   | 27.53  | -1.52 |
| <i>SFRP1</i>    | NM_003012.3    | NM_003012.3:3320    | Endogenous   | 63.51  | 1.09  |
| <i>SFRP2</i>    | NM_003013.2    | NM_003013.2:840     | Endogenous   | 10.12  | -1.28 |
| <i>SFRP4</i>    | NM_003014.2    | NM_003014.2:1060    | Endogenous   | 42.13  | -2.56 |
| <i>SGK2</i>     | NM_170693.1    | NM_170693.1:1485    | Endogenous   | 42.49  | -1.61 |
| <i>SHC1</i>     | NM_183001.4    | NM_183001.4:3355    | Endogenous   | 21.18  | -1.28 |
| <i>SHC2</i>     | NM_012435.2    | NM_012435.2:698     | Endogenous   | 122.08 | 8.13  |
| <i>SHC3</i>     | NM_016848.5    | NM_016848.5:6155    | Endogenous   | 20.19  | 1.56  |
| <i>SHC4</i>     | NM_203349.2    | NM_203349.2:1570    | Endogenous   | 12.53  | -2.24 |
| <i>SIN3A</i>    | NM_015477.1    | NM_015477.1:1605    | Endogenous   | 28.59  | -1.83 |
| <i>SIRT4</i>    | NM_012240.1    | NM_012240.1:915     | Endogenous   | 45.80  | -2.29 |
| <i>SIX1</i>     | NM_005982.3    | NM_005982.3:25      | Endogenous   | 47.46  | -1.28 |
| <i>SKP1</i>     | NM_170679.2    | NM_170679.2:630     | Endogenous   | 7.80   | -1.20 |
| <i>SKP2</i>     | NM_005983.2    | NM_005983.2:615     | Endogenous   | 17.08  | 1.21  |
| <i>SLC4A1AP</i> | NM_018158.2    | NM_018158.2:980     | Housekeeping | 19.54  | -1.24 |
| <i>SMAD2</i>    | NM_001003652.1 | NM_001003652.1:4500 | Endogenous   | 25.46  | 1.04  |
| <i>SMAD3</i>    | NM_005902.3    | NM_005902.3:4220    | Endogenous   | 19.33  | -1.65 |
| <i>SMAD4</i>    | NM_005359.3    | NM_005359.3:1370    | Endogenous   | 7.55   | 1.13  |
| <i>SMAD9</i>    | NM_005905.2    | NM_005905.2:1595    | Endogenous   | 86.94  | -9.60 |
| <i>SMARCA4</i>  | NM_003072.3    | NM_003072.3:5400    | Endogenous   | 22.01  | -1.65 |
| <i>SMARCB1</i>  | NM_003073.3    | NM_003073.3:1060    | Endogenous   | 15.04  | -1.01 |
| <i>SMC1A</i>    | NM_006306.2    | NM_006306.2:2320    | Endogenous   | 24.24  | 1.13  |
| <i>SMC1B</i>    | NM_148674.3    | NM_148674.3:3600    | Endogenous   | 13.80  | 1.17  |
| <i>SMC3</i>     | NM_005445.3    | NM_005445.3:3525    | Endogenous   | 23.80  | -1.72 |
| <i>SMO</i>      | NM_005631.3    | NM_005631.3:1615    | Endogenous   | 20.04  | -1.76 |
| <i>SOCS1</i>    | NM_003745.1    | NM_003745.1:1025    | Endogenous   | 67.32  | -3.15 |
| <i>SOCS2</i>    | NM_003877.3    | NM_003877.3:1020    | Endogenous   | 149.70 | 19.89 |
| <i>SOCS3</i>    | NM_003955.3    | NM_003955.3:1870    | Endogenous   | 51.48  | 2.51  |
| <i>SOS1</i>     | NM_005633.2    | NM_005633.2:1635    | Endogenous   | 15.57  | -1.52 |
| <i>SOS2</i>     | NM_006939.2    | NM_006939.2:3845    | Endogenous   | 11.84  | -1.54 |
| <i>SOST</i>     | NM_025237.2    | NM_025237.2:980     | Endogenous   | 29.47  | 1.17  |
| <i>SOX17</i>    | NM_022454.3    | NM_022454.3:1374    | Endogenous   | 18.60  | -1.65 |
| <i>SOX9</i>     | NM_000346.2    | NM_000346.2:2135    | Endogenous   | 11.57  | 1.12  |

|                  |                |                     |              |        |       |
|------------------|----------------|---------------------|--------------|--------|-------|
| <i>SP1</i>       | NM_003109.1    | NM_003109.1:5970    | Endogenous   | 17.20  | -1.60 |
| <i>SPOP</i>      | NM_001007226.1 | NM_001007226.1:2726 | Endogenous   | 15.64  | -1.05 |
| <i>SPP1</i>      | NM_000582.2    | NM_000582.2:760     | Endogenous   | 10.40  | -1.46 |
| <i>SPRY1</i>     | NM_005841.1    | NM_005841.1:810     | Endogenous   | 31.56  | -1.47 |
| <i>SPRY2</i>     | NM_005842.2    | NM_005842.2:85      | Endogenous   | 50.53  | 1.85  |
| <i>SPRY4</i>     | NM_030964.3    | NM_030964.3:1900    | Endogenous   | 12.31  | -1.49 |
| <i>SRSF2</i>     | NM_003016.3    | NM_003016.3:312     | Endogenous   | 35.96  | 1.63  |
| <i>SSX1</i>      | NM_005635.2    | NM_005635.2:148     | Endogenous   | 27.19  | -1.60 |
| <i>STAG2</i>     | NM_001042749.1 | NM_001042749.1:4040 | Endogenous   | 9.01   | -1.03 |
| <i>STAT1</i>     | NM_007315.2    | NM_007315.2:205     | Endogenous   | 20.95  | 1.16  |
| <i>STAT3</i>     | NM_139276.2    | NM_139276.2:4535    | Endogenous   | 37.63  | 1.85  |
| <i>STAT4</i>     | NM_003151.2    | NM_003151.2:789     | Endogenous   | 32.72  | -1.28 |
| <i>STK11</i>     | NM_000455.4    | NM_000455.4:2060    | Endogenous   | 28.03  | 1.33  |
| <i>STMN1</i>     | NM_203401.1    | NM_203401.1:478     | Endogenous   | 19.22  | -1.93 |
| <i>SUV39H2</i>   | NM_024670.3    | NM_024670.3:2035    | Endogenous   | 2.37   | 1.08  |
| <i>SYK</i>       | NM_003177.3    | NM_003177.3:1685    | Endogenous   | 56.66  | 2.23  |
| <i>TBL1XR1</i>   | NM_024665.4    | NM_024665.4:915     | Endogenous   | 14.98  | -1.38 |
| <i>TCF3</i>      | NM_003200.2    | NM_003200.2:4325    | Endogenous   | 50.07  | 1.63  |
| <i>TCF7L1</i>    | NM_031283.1    | NM_031283.1:2215    | Endogenous   | 28.76  | -1.02 |
| <i>TCL1B</i>     | NM_004918.2    | NM_004918.2:319     | Endogenous   | 29.47  | 1.17  |
| <i>TET2</i>      | NM_001127208.2 | NM_001127208.2:2882 | Endogenous   | 13.97  | 1.08  |
| <i>TFDP1</i>     | NM_007111.4    | NM_007111.4:1826    | Endogenous   | 45.33  | 1.58  |
| <i>TGFB1</i>     | NM_000660.3    | NM_000660.3:1260    | Endogenous   | 19.47  | 1.44  |
| <i>TGFB2</i>     | NM_003238.2    | NM_003238.2:1125    | Endogenous   | 23.40  | -1.79 |
| <i>TGFB3</i>     | NM_003239.2    | NM_003239.2:2825    | Endogenous   | 19.16  | 1.17  |
| <i>TGFB2</i>     | NM_001024847.1 | NM_001024847.1:1760 | Endogenous   | 13.57  | -1.29 |
| <i>THBS1</i>     | NM_003246.2    | NM_003246.2:3465    | Endogenous   | 96.32  | 7.06  |
| <i>THBS4</i>     | NM_003248.3    | NM_003248.3:985     | Endogenous   | 57.84  | -3.84 |
| <i>THEM4</i>     | NM_053055.4    | NM_053055.4:764     | Endogenous   | 59.76  | 2.34  |
| <i>TIAM1</i>     | NM_003253.2    | NM_003253.2:5620    | Endogenous   | 34.70  | -1.85 |
| <i>TLK2</i>      | NM_006852.2    | NM_006852.2:2335    | Housekeeping | 5.77   | 1.08  |
| <i>TLR2</i>      | NM_003264.3    | NM_003264.3:180     | Endogenous   | 61.64  | -1.02 |
| <i>TLR4</i>      | NM_138554.2    | NM_138554.2:2570    | Endogenous   | 141.52 | 12.76 |
| <i>TLX1</i>      | NM_005521.3    | NM_005521.3:1915    | Endogenous   | 48.22  | -1.60 |
| <i>TMPRSS2</i>   | NM_005656.2    | NM_005656.2:1290    | Endogenous   | 131.43 | 6.29  |
| <i>TMUB2</i>     | NM_024107.2    | NM_024107.2:1485    | Housekeeping | 13.07  | -1.23 |
| <i>TNC</i>       | NM_002160.3    | NM_002160.3:4       | Endogenous   | 22.28  | 1.38  |
| <i>TNF</i>       | NM_000594.2    | NM_000594.2:1010    | Endogenous   | 112.83 | -3.84 |
| <i>TNFAIP3</i>   | NM_006290.2    | NM_006290.2:260     | Endogenous   | 65.20  | -1.38 |
| <i>TNFRSF10A</i> | NM_003844.2    | NM_003844.2:950     | Endogenous   | 24.19  | 1.64  |

|                  |                |                     |              |        |       |
|------------------|----------------|---------------------|--------------|--------|-------|
| <i>TNFRSF10B</i> | NM_003842.3    | NM_003842.3:565     | Endogenous   | 22.46  | -1.09 |
| <i>TNFRSF10C</i> | NM_003841.2    | NM_003841.2:5       | Endogenous   | 31.97  | -2.38 |
| <i>TNFRSF10D</i> | NM_003840.3    | NM_003840.3:2380    | Endogenous   | 27.25  | 1.21  |
| <i>TNFSF10</i>   | NM_003810.2    | NM_003810.2:115     | Endogenous   | 69.20  | -4.27 |
| <i>TNN</i>       | NM_022093.1    | NM_022093.1:3580    | Endogenous   | 46.10  | 3.13  |
| <i>TNR</i>       | NM_003285.2    | NM_003285.2:3154    | Endogenous   | 12.46  | -1.02 |
| <i>TP53</i>      | NM_000546.2    | NM_000546.2:1330    | Endogenous   | 17.02  | -1.87 |
| <i>TPO</i>       | NM_175722.1    | NM_175722.1:2400    | Endogenous   | 101.14 | 3.13  |
| <i>TRAF7</i>     | NM_032271.2    | NM_032271.2:1105    | Endogenous   | 12.92  | -1.40 |
| <i>TRIM39</i>    | NM_021253.3    | NM_021253.3:3140    | Housekeeping | 20.33  | 1.26  |
| <i>TSC1</i>      | NM_000368.3    | NM_000368.3:100     | Endogenous   | 12.09  | 1.07  |
| <i>TSHR</i>      | NM_001018036.2 | NM_001018036.2:735  | Endogenous   | 30.84  | 1.95  |
| <i>TSLP</i>      | NM_033035.4    | NM_033035.4:899     | Endogenous   | 41.18  | 1.56  |
| <i>TPAN7</i>     | NM_004615.3    | NM_004615.3:725     | Endogenous   | 54.97  | 2.34  |
| <i>TTC31</i>     | NR_027749.1    | NR_027749.1:2720    | Housekeeping | 23.51  | -1.54 |
| <i>TTK</i>       | NM_003318.3    | NM_003318.3:1200    | Endogenous   | 13.80  | -1.50 |
| <i>U2AF1</i>     | NM_001025203.1 | NM_001025203.1:400  | Endogenous   | 7.93   | -1.10 |
| <i>UBB</i>       | NM_018955.2    | NM_018955.2:15      | Endogenous   | 15.43  | 1.24  |
| <i>UBE2T</i>     | NM_014176.3    | NM_014176.3:595     | Endogenous   | 4.41   | -1.47 |
| <i>USP39</i>     | NM_001256725.1 | NM_001256725.1:806  | Housekeeping | 15.25  | -1.28 |
| <i>UTY</i>       | NM_007125.3    | NM_007125.3:450     | Endogenous   | 39.31  | -1.92 |
| <i>VEGFA</i>     | NM_001025366.1 | NM_001025366.1:1325 | Endogenous   | 28.54  | -1.48 |
| <i>VEGFC</i>     | NM_005429.2    | NM_005429.2:565     | Endogenous   | 72.35  | -1.28 |
| <i>VHL</i>       | NM_000551.2    | NM_000551.2:1280    | Endogenous   | 8.40   | 1.14  |
| <i>VPS33B</i>    | NM_018668.3    | NM_018668.3:2140    | Housekeeping | 17.32  | -1.61 |
| <i>WEE1</i>      | NM_003390.3    | NM_003390.3:1225    | Endogenous   | 17.57  | -1.79 |
| <i>WHSC1</i>     | NM_007331.1    | NM_007331.1:1260    | Endogenous   | 16.68  | -1.57 |
| <i>WHSC1L1</i>   | NM_017778.2    | NM_017778.2:485     | Endogenous   | 20.90  | -1.50 |
| <i>WIF1</i>      | NM_007191.2    | NM_007191.2:765     | Endogenous   | 85.05  | 1.56  |
| <i>WNT10A</i>    | NM_025216.2    | NM_025216.2:2255    | Endogenous   | 31.41  | -1.73 |
| <i>WNT10B</i>    | NM_003394.2    | NM_003394.2:2070    | Endogenous   | 50.71  | 2.29  |
| <i>WNT11</i>     | NM_004626.2    | NM_004626.2:960     | Endogenous   | 63.46  | -5.28 |
| <i>WNT16</i>     | NM_057168.1    | NM_057168.1:1621    | Endogenous   | 19.31  | -2.56 |
| <i>WNT2</i>      | NM_003391.2    | NM_003391.2:2014    | Endogenous   | 21.35  | -1.28 |
| <i>WNT2B</i>     | NM_024494.1    | NM_024494.1:1530    | Endogenous   | 47.62  | -3.52 |
| <i>WNT3</i>      | NM_030753.3    | NM_030753.3:1335    | Endogenous   | 22.77  | 1.06  |
| <i>WNT4</i>      | NM_030761.3    | NM_030761.3:625     | Endogenous   | 52.42  | -4.48 |
| <i>WNT5A</i>     | NM_003392.3    | NM_003392.3:475     | Endogenous   | 19.83  | 2.34  |
| <i>WNT5B</i>     | NM_032642.2    | NM_032642.2:1745    | Endogenous   | 135.27 | 10.00 |
| <i>WNT6</i>      | NM_006522.3    | NM_006522.3:1200    | Endogenous   | 29.04  | 1.30  |

|                |                |                     |              |       |       |
|----------------|----------------|---------------------|--------------|-------|-------|
| <i>WNT7A</i>   | NM_004625.3    | NM_004625.3:325     | Endogenous   | 18.15 | 1.41  |
| <i>WNT7B</i>   | NM_058238.1    | NM_058238.1:1535    | Endogenous   | 53.07 | -3.98 |
| <i>WT1</i>     | NM_000378.3    | NM_000378.3:2160    | Endogenous   | 72.97 | 4.69  |
| <i>XPA</i>     | NM_000380.3    | NM_000380.3:265     | Endogenous   | 5.02  | -1.09 |
| <i>XRCC4</i>   | NM_003401.3    | NM_003401.3:772     | Endogenous   | 19.04 | 1.26  |
| <i>ZAK</i>     | NM_016653.2    | NM_016653.2:995     | Endogenous   | 9.59  | -1.24 |
| <i>ZBTB16</i>  | NM_006006.4    | NM_006006.4:1585    | Endogenous   | 48.76 | -1.28 |
| <i>ZBTB32</i>  | NM_014383.1    | NM_014383.1:1620    | Endogenous   | 56.97 | 1.04  |
| <i>ZC3H14</i>  | NM_001160103.1 | NM_001160103.1:2690 | Housekeeping | 68.05 | 2.60  |
| <i>ZIC2</i>    | NM_007129.2    | NM_007129.2:1849    | Endogenous   | 50.32 | -3.84 |
| <i>ZKSCAN5</i> | NM_014569.3    | NM_014569.3:3688    | Housekeeping | 9.88  | 1.14  |
| <i>ZNF143</i>  | NM_003442.5    | NM_003442.5:925     | Housekeeping | 6.61  | -1.15 |
| <i>ZNF346</i>  | NM_012279.2    | NM_012279.2:2260    | Housekeeping | 21.09 | 1.78  |
| <i>ZNF384</i>  | NM_133476.3    | NM_133476.3:300     | Housekeeping | 8.73  | 1.46  |

---
